# Supplementary material for: Global, regional, and national burden of 10 digestive diseases in 204 countries and territories from 1990 to 2019
Source: PubMed Central journal article supplement (PMC10088561; doi:10.3389/fpubh.2023.1061453), 2023-03-28
Supplement: Data_Sheet_1.pdf [file Data_Sheet_1.pdf]

## Supplement to: **Global, regional, and national burden of 10 digestive diseases in 204 countries and territories from 1990 to 2019**

### **Contents:**

#### **Supplementary Figures**

Supplementary Figure 1: GBD 2019 cause hierarchy for digestive diseases.

Supplementary Figure 2: Proportion of global digestive diseases DALYs attributable to each disorder for both sexes and all ages in 2019.

Supplementary Figure 3: All-cause rankings of DALYs for digestive diseases for both sexes by all ages and five age groups in 2019.

Supplementary Figure 4: All-cause rankings of DALYs for digestive diseases for males by all ages and five age groups in 2019.

Supplementary Figure 5: All-cause rankings of DALYs for digestive diseases for females by all ages and five age groups in 2019.

Supplementary Figure 6: Percentage contribution of risk factors to all-age DALYs of digestive diseases in 2019 for males and females, globally and by regions.

#### **Supplementary Tables**

Supplementary Table 1: Digestive diseases included in GBD 2019.

Supplementary Table 2: Incident cases, years of life lost (YLLs), years lived with disability (YLDs) and their age-standardised rates due to digestive diseases in 2019 for both sexes.

Supplementary Table 3: Disability-adjusted life-years (DALYs) and age-standardised DALY rate due to digestive diseases in 2019 for both sexes by location.

Supplementary Table 4: Temporal trend in various age-standardised rates of digestive diseases globally and in 204 countries or territories from 1990 to 2019.

Supplementary Table 5: Disability-adjusted life-years (DALYs), with 95% uncertainty intervals, due to digestive diseases in 2019 for both sexes by SDI quintile and location.

Supplementary Table 6: Percentage contribution of risk factors to all-age disability-adjusted life-years (DALYs) of digestive diseases in 2019 for both sexes, globally and by regions.

**Supplementary Figure 1** GBD 2019 cause hierarchy for digestive diseases

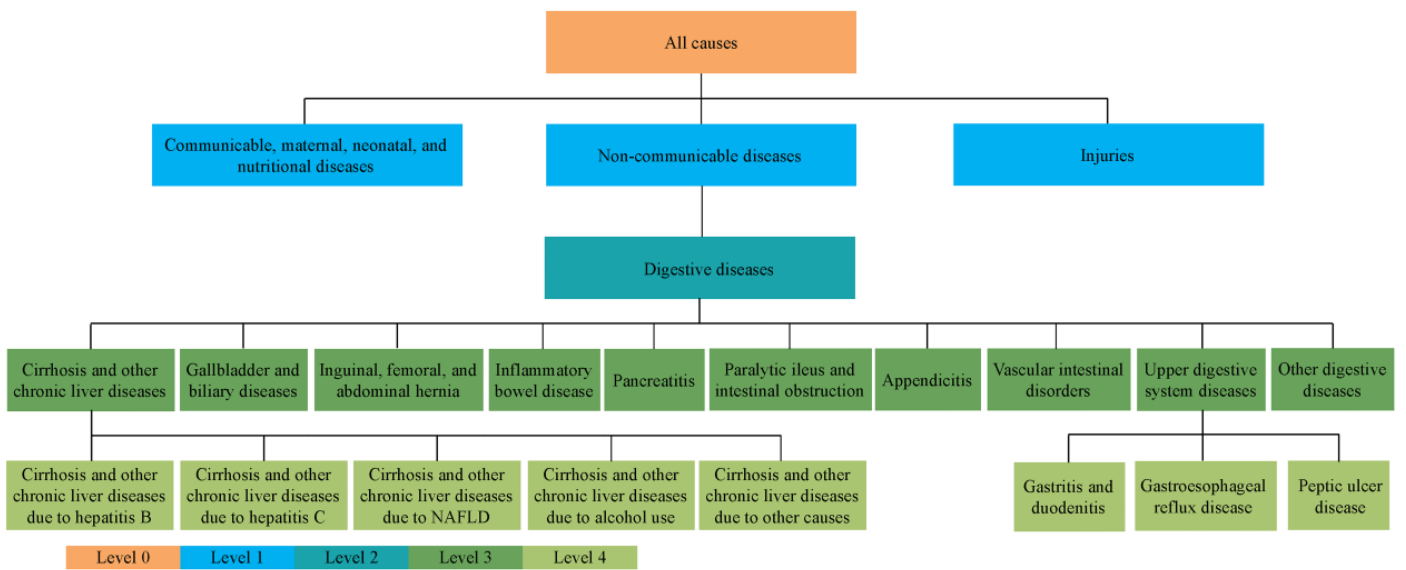

Abbreviation: GBD, Global Burden of Diseases, Injuries, and Risk Factors Study.

**Supplementary Figure 2** Proportion of global digestive diseases DALYs attributable to each disorder for both sexes and all ages in 2019

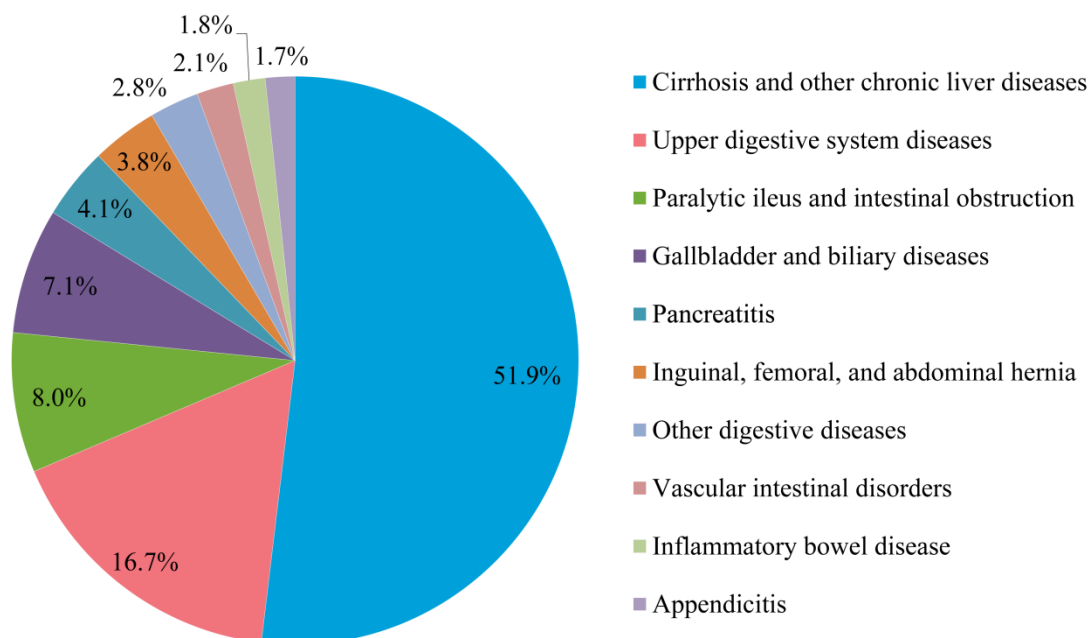

Abbreviation: DALYs, disability-adjusted life-years.

**Supplementary Figure 3** All-cause rankings of DALYs for digestive diseases for both sexes by all ages and five age groups in 2019

DALYs

| All ages                                         | 0-14 years                                       | 15-24 years                                      | 25-49 years                                      | 50-69 years                                      | ≥70 years                                        |
|--------------------------------------------------|--------------------------------------------------|--------------------------------------------------|--------------------------------------------------|--------------------------------------------------|--------------------------------------------------|
| 16<br>Cirrhosis and other chronic liver diseases | 37<br>Paralytic ileus and intestinal obstruction | 28<br>Cirrhosis and other chronic liver diseases | 12<br>Cirrhosis and other chronic liver diseases | 7<br>Cirrhosis and other chronic liver diseases  | 17<br>Cirrhosis and other chronic liver diseases |
| 43<br>Upper digestive system diseases            | 52<br>Cirrhosis and other chronic liver diseases | 47<br>Upper digestive system diseases            | 32<br>Upper digestive system diseases            | 34<br>Upper digestive system diseases            | 34<br>Upper digestive system diseases            |
| 70<br>Paralytic ileus and intestinal obstruction | 69<br>Inguinal, femoral, and abdominal hernia    | 69<br>Paralytic ileus and intestinal obstruction | 63<br>Gallbladder and biliary diseases           | 58<br>Gallbladder and biliary diseases           | 46<br>Gallbladder and biliary diseases           |
| 75<br>Gallbladder and biliary diseases           | 82<br>Upper digestive system diseases            | 85<br>Appendicitis                               | 67<br>Pancreatitis                               | 69<br>Paralytic ileus and intestinal obstruction | 49<br>Paralytic ileus and intestinal obstruction |
| 99<br>Pancreatitis                               | 88<br>Other digestive diseases                   | 92<br>Gallbladder and biliary diseases           | 76<br>Paralytic ileus and intestinal obstruction | 79<br>Pancreatitis                               | 61<br>Vascular intestinal disorders              |
| 103<br>Inguinal, femoral, and abdominal hernia   | 90<br>Appendicitis                               | 94<br>Inguinal, femoral, and abdominal hernia    | 97<br>Inguinal, femoral, and abdominal hernia    | 85<br>Inguinal, femoral, and abdominal hernia    | 65<br>Other digestive diseases                   |
| 115<br>Other digestive diseases                  | 103<br>Gallbladder and biliary diseases          | 101<br>Pancreatitis                              | 107<br>Inflammatory bowel disease                | 96<br>Other digestive diseases                   | 80<br>Pancreatitis                               |
| 127<br>Vascular intestinal disorders             | 110<br>Inflammatory bowel disease                | 117<br>Other digestive diseases                  | 116<br>Appendicitis                              | 102<br>Vascular intestinal disorders             | 84<br>Inguinal, femoral, and abdominal hernia    |
| 133<br>Inflammatory bowel disease                | 117<br>Pancreatitis                              | 121<br>Inflammatory bowel disease                | 118<br>Other digestive diseases                  | 111<br>Inflammatory bowel disease                | 97<br>Inflammatory bowel disease                 |
| 135<br>Appendicitis                              | 123<br>Vascular intestinal disorders             | 141<br>Vascular intestinal disorders             | 141<br>Vascular intestinal disorders             | 128<br>Appendicitis                              | 124<br>Appendicitis                              |

Note: This table shows DALYs rankings for each digestive disease which is ranked out of all Level 3 causes within the GBD study. Disorders are ordered from highest to lowest ranking for the overall age group (ie, all ages). Each colour represents a different digestive disease. DALYs=disability-adjusted life-years. GBD=Global Burden of Diseases, Injuries, and Risk Factors Study.

**Supplementary Figure 4** All-cause rankings of DALYs for digestive diseases for males by all ages and five age groups in 2019

DALYs for males

| All ages                                         | 0-14 years                                       | 15-24 years                                      | 25-49 years                                      | 50-69 years                                      | ≥70 years                                        |
|--------------------------------------------------|--------------------------------------------------|--------------------------------------------------|--------------------------------------------------|--------------------------------------------------|--------------------------------------------------|
| 9<br>Cirrhosis and other chronic liver diseases  | 36<br>Paralytic ileus and intestinal obstruction | 25<br>Cirrhosis and other chronic liver diseases | 4<br>Cirrhosis and other chronic liver diseases  | 6<br>Cirrhosis and other chronic liver diseases  | 16<br>Cirrhosis and other chronic liver diseases |
| 44<br>Upper digestive system diseases            | 52<br>Cirrhosis and other chronic liver diseases | 49<br>Upper digestive system diseases            | 29<br>Upper digestive system diseases            | 34<br>Upper digestive system diseases            | 32<br>Upper digestive system diseases            |
| 65<br>Paralytic ileus and intestinal obstruction | 64<br>Inguinal, femoral, and abdominal hernia    | 68<br>Paralytic ileus and intestinal obstruction | 53<br>Pancreatitis                               | 61<br>Paralytic ileus and intestinal obstruction | 46<br>Paralytic ileus and intestinal obstruction |
| 85<br>Pancreatitis                               | 83<br>Upper digestive system diseases            | 86<br>Inguinal, femoral, and abdominal hernia    | 66<br>Paralytic ileus and intestinal obstruction | 67<br>Gallbladder and biliary diseases           | 47<br>Gallbladder and biliary diseases           |
| 86<br>Inguinal, femoral, and abdominal hernia    | 88<br>Other digestive diseases                   | 91<br>Appendicitis                               | 76<br>Inguinal, femoral, and abdominal hernia    | 69<br>Inguinal, femoral, and abdominal hernia    | 63<br>Vascular intestinal disorders              |
| 94<br>Gallbladder and biliary diseases           | 90<br>Appendicitis                               | 92<br>Pancreatitis                               | 79<br>Gallbladder and biliary diseases           | 70<br>Pancreatitis                               | 66<br>Inguinal, femoral, and abdominal hernia    |
| 112<br>Other digestive diseases                  | 106<br>Gallbladder and biliary diseases          | 104<br>Gallbladder and biliary diseases          | 106<br>Other digestive diseases                  | 91<br>Other digestive diseases                   | 67<br>Other digestive diseases                   |
| 124<br>Vascular intestinal disorders             | 109<br>Inflammatory bowel disease                | 112<br>Other digestive diseases                  | 107<br>Inflammatory bowel disease                | 100<br>Vascular intestinal disorders             | 75<br>Pancreatitis                               |
| 127<br>Inflammatory bowel disease                | 112<br>Vascular intestinal disorders             | 118<br>Inflammatory bowel disease                | 116<br>Appendicitis                              | 110<br>Inflammatory bowel disease                | 97<br>Inflammatory bowel disease                 |
| 132<br>Appendicitis                              | 124<br>Pancreatitis                              | 135<br>Vascular intestinal disorders             | 139<br>Vascular intestinal disorders             | 127<br>Appendicitis                              | 117<br>Appendicitis                              |

Note: This table shows DALYs rankings for each digestive disease which is ranked out of all Level 3 causes within the GBD study. Disorders are ordered from highest to lowest ranking for the overall age group (ie, all ages). Each colour represents a different digestive disease. DALYs=disability-adjusted life-years. GBD=Global Burden of Diseases, Injuries, and Risk Factors Study.

**Supplementary Figure 5** All-cause rankings of DALYs for digestive diseases for females by all ages and five age groups in 2019

DALYs for females

| All ages                                         | 0-14 years                                       | 15-24 years                                      | 25-49 years                                      | 50-69 years                                      | ≥70 years                                        |
|--------------------------------------------------|--------------------------------------------------|--------------------------------------------------|--------------------------------------------------|--------------------------------------------------|--------------------------------------------------|
| 26<br>Cirrhosis and other chronic liver diseases | 43<br>Paralytic ileus and intestinal obstruction | 31<br>Cirrhosis and other chronic liver diseases | 23<br>Cirrhosis and other chronic liver diseases | 14<br>Cirrhosis and other chronic liver diseases | 20<br>Cirrhosis and other chronic liver diseases |
| 42<br>Upper digestive system diseases            | 54<br>Cirrhosis and other chronic liver diseases | 41<br>Upper digestive system diseases            | 33<br>Upper digestive system diseases            | 35<br>Upper digestive system diseases            | 31<br>Upper digestive system diseases            |
| 59<br>Gallbladder and biliary diseases           | 79<br>Upper digestive system diseases            | 66<br>Paralytic ileus and intestinal obstruction | 48<br>Gallbladder and biliary diseases           | 42<br>Gallbladder and biliary diseases           | 43<br>Gallbladder and biliary diseases           |
| 71<br>Paralytic ileus and intestinal obstruction | 82<br>Inguinal, femoral, and abdominal hernia    | 73<br>Appendicitis                               | 79<br>Paralytic ileus and intestinal obstruction | 66<br>Paralytic ileus and intestinal obstruction | 49<br>Paralytic ileus and intestinal obstruction |
| 108<br>Other digestive diseases                  | 86<br>Appendicitis                               | 82<br>Gallbladder and biliary diseases           | 100<br>Pancreatitis                              | 80<br>Pancreatitis                               | 55<br>Vascular intestinal disorders              |
| 109<br>Pancreatitis                              | 88<br>Other digestive diseases                   | 108<br>Pancreatitis                              | 104<br>Inflammatory bowel disease                | 90<br>Other digestive diseases                   | 62<br>Other digestive diseases                   |
| 121<br>Vascular intestinal disorders             | 93<br>Gallbladder and biliary diseases           | 112<br>Inguinal, femoral, and abdominal hernia   | 108<br>Appendicitis                              | 101<br>Vascular intestinal disorders             | 78<br>Pancreatitis                               |
| 123<br>Inguinal, femoral, and abdominal hernia   | 110<br>Inflammatory bowel disease                | 116<br>Other digestive diseases                  | 120<br>Inguinal, femoral, and abdominal hernia   | 108<br>Inflammatory bowel disease                | 89<br>Inflammatory bowel disease                 |
| 125<br>Inflammatory bowel disease                | 114<br>Pancreatitis                              | 117<br>Inflammatory bowel disease                | 121<br>Other digestive diseases                  | 111<br>Inguinal, femoral, and abdominal hernia   | 95<br>Inguinal, femoral, and abdominal hernia    |
| 126<br>Appendicitis                              | 134<br>Vascular intestinal disorders             | 139<br>Vascular intestinal disorders             | 139<br>Vascular intestinal disorders             | 124<br>Appendicitis                              | 121<br>Appendicitis                              |

Note: This table shows DALYs rankings for each digestive disease which is ranked out of all Level 3 causes within the GBD study. Disorders are ordered from highest to lowest ranking for the overall age group (ie, all ages). Each colour represents a different digestive disease. DALYs=disability-adjusted life-years. GBD=Global Burden of Diseases, Injuries, and Risk Factors Study.

**Supplementary Figure 6** Percentage contribution of risk factors to all-age DALYs of digestive diseases in 2019 for males and females, globally and by regions

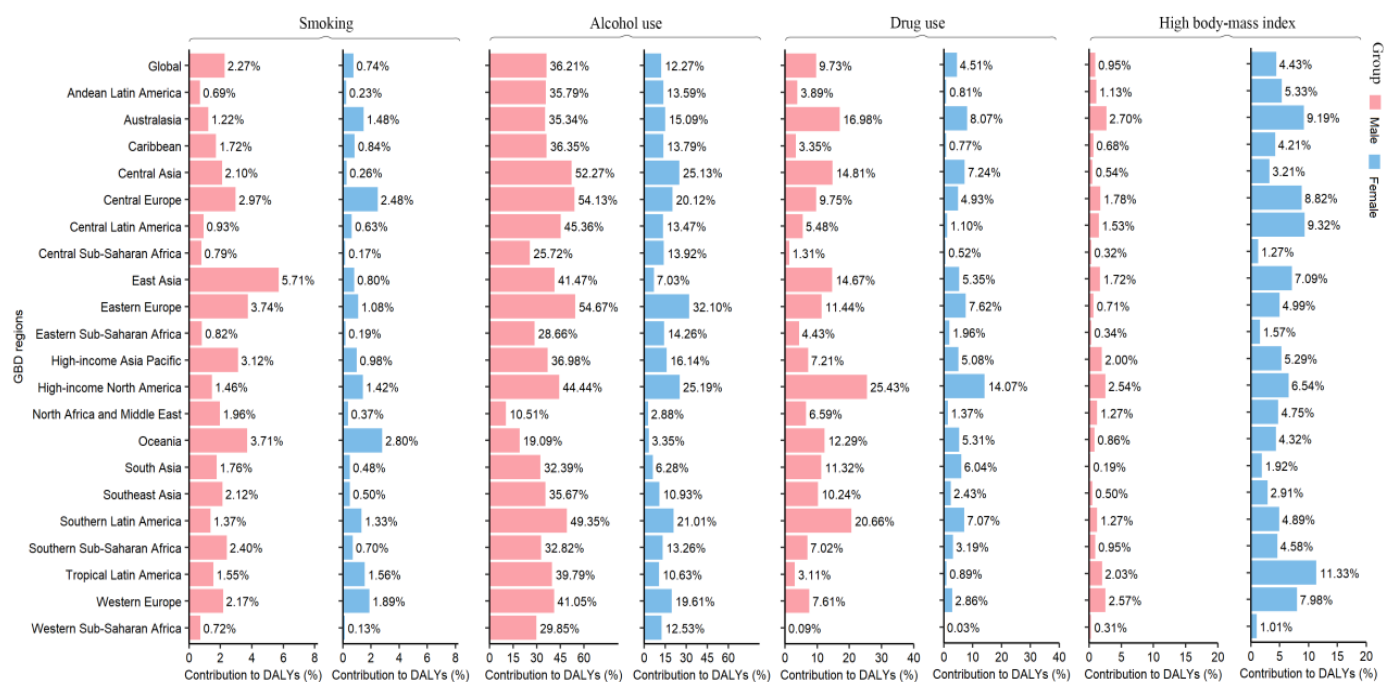

Abbreviation: DALYs, disability-adjusted life-years.

### Supplementary Table 1 Digestive diseases included in GBD 2019

| <b>Cause</b>                               | <b>Corresponding ICD-10 codes</b>                                                                                                                                                                                |
|--------------------------------------------|------------------------------------------------------------------------------------------------------------------------------------------------------------------------------------------------------------------|
| Cirrhosis and other chronic liver diseases | I85-I85.9, I98.2, K70-K71, K71.3-K72, K72.1-K75, K75.2, K75.4-K76.2, K76.4-K77.8, R16-R18.9, Z52.6, Z94.4                                                                                                        |
| Upper digestive system diseases            | K21-K21.9, K22.7-K22.719, K25-K30, R12                                                                                                                                                                           |
| Gallbladder and biliary diseases           | K80-K80.81, K81-K83.9, K87-K87.1                                                                                                                                                                                 |
| Inguinal, femoral, and abdominal hernia    | K40-K42.9, K44-K46.9                                                                                                                                                                                             |
| Inflammatory bowel disease                 | K50-K51.319, K51.5-K52, K52.8-K52.9                                                                                                                                                                              |
| Pancreatitis                               | K85-K86.9                                                                                                                                                                                                        |
| Appendicitis                               | K35-K37.9                                                                                                                                                                                                        |
| Paralytic ileus and intestinal obstruction | K56-K56.9                                                                                                                                                                                                        |
| Vascular intestinal disorders              | K55-K55.9                                                                                                                                                                                                        |
| Other digestive diseases                   | I84-I84.9, K20-K20.9, K22-K22.6, K22.8-K23.8, K31-K31.9, K38-K38.9, K52.2-K52.3, K57-K62, K62.4-K62.6, K62.8-K63.4, K63.8-K67, K67.8-K68.1, K68.12-K68.9, K71.0-K71.2, K72.0-K72.01, K90-K90.9, K92-K92.9, K93.8 |

Abbreviations: GBD, Global Burden of Diseases, Injuries, and Risk Factors Study; ICD-10, 10th revision of the International Classification of Diseases.



**Supplementary Table 2** Incident cases, years of life lost (YLLs), years lived with disability (YLDs) and their age-standardised rates due to digestive diseases in 2019 for both sexes

| <b>Characteristics</b>                     | <b>Incident cases, in millions (95% UI)</b> | <b>Age-standardised incidence rate per 100,000 population (95% UI)</b> | <b>YLLs, in millions (95% UI)</b> | <b>Age-standardised YLL rate per 100,000 population (95% UI)</b> | <b>YLDs, in millions (95% UI)</b> | <b>Age-standardised YLD rate per 100,000 population (95% UI)</b> |
|--------------------------------------------|---------------------------------------------|------------------------------------------------------------------------|-----------------------------------|------------------------------------------------------------------|-----------------------------------|------------------------------------------------------------------|
| <b>Global</b>                              | 443.53<br>(405.58-484.42)                   | 5454.63<br>(4988.69-5942.26)                                           | 71.97<br>(67.01-77.12)            | 887.74<br>(825.82-952.74)                                        | 17.02<br>(11.91-23.88)            | 209.25<br>(146.37-292.88)                                        |
| <b>SDI quintile</b>                        |                                             |                                                                        |                                   |                                                                  |                                   |                                                                  |
| High                                       | 68.28<br>(62.79-74.60)                      | 5237.73<br>(4805.17-5740.57)                                           | 7.80<br>(7.39-8.09)               | 481.08<br>(460.92-497.08)                                        | 2.72<br>(1.94-3.75)               | 206.43<br>(146.91-286.53)                                        |
| High-middle                                | 91.02<br>(83.78-99.72)                      | 5207.59<br>(4786.46-5672.83)                                           | 11.79<br>(11.08-12.53)            | 625.52<br>(587.62-664.66)                                        | 3.66<br>(2.58-5.08)               | 206.11<br>(144.37-286.60)                                        |
| Middle                                     | 131.48<br>(120.21-143.83)                   | 5079.07<br>(4650.21-5522.56)                                           | 20.06<br>(18.48-21.89)            | 794.36<br>(729.68-868.12)                                        | 5.09<br>(3.53-7.13)               | 196.64<br>(136.75-275.03)                                        |
| Low-middle                                 | 103.46<br>(93.82-113.47)                    | 6198.92<br>(5661.78-6770.73)                                           | 20.33<br>(18.49-22.35)            | 1306.49<br>(1191.92-1431.91)                                     | 3.80<br>(2.63-5.36)               | 231.29<br>(160.54-325.99)                                        |
| Low                                        | 49.04<br>(43.99-54.36)                      | 5905.23<br>(5348.25-6503.46)                                           | 11.94<br>(10.28-13.75)            | 1602.31<br>(1409.88-1812.10)                                     | 1.75<br>(1.18-2.52)               | 211.58<br>(144.31-303.32)                                        |
| <b>Disorders</b>                           |                                             |                                                                        |                                   |                                                                  |                                   |                                                                  |
| Cirrhosis and other chronic liver diseases | 2.05<br>(1.66-2.48)                         | 25.35<br>(20.78-30.44)                                                 | 45.49<br>(42.33-48.79)            | 551.86<br>(513.55-592.55)                                        | 0.69<br>(0.48-0.97)               | 8.57<br>(5.93-12.03)                                             |
| Upper digestive system diseases            | 343.97<br>(305.20-383.74)                   | 4216.93<br>(3734.36-4713.11)                                           | 6.47<br>(6.02-7.08)               | 79.98<br>(74.35-87.33)                                           | 8.40<br>(4.93-13.77)              | 102.83<br>(60.37-168.66)                                         |
| Gallbladder and biliary diseases           | 52.00<br>(44.20-61.21)                      | 634.32<br>(540.21-742.93)                                              | 2.29<br>(1.97-2.52)               | 28.92<br>(24.89-31.76)                                           | 4.06<br>(2.60-5.95)               | 49.33<br>(31.51-71.96)                                           |
| Inguinal, femoral, and abdominal hernia    | 13.02<br>(10.68-15.49)                      | 162.96<br>(134.12-192.86)                                              | 1.16<br>(0.99-1.32)               | 15.12<br>(12.89-17.25)                                           | 2.20<br>(1.47-3.07)               | 27.62<br>(18.49-38.67)                                           |
| Inflammatory bowel disease                 | 0.40<br>(0.36-0.46)                         | 4.97<br>(4.43-5.59)                                                    | 0.90<br>(0.78-1.00)               | 11.35<br>(9.89-12.70)                                            | 0.73<br>(0.49-0.99)               | 8.80<br>(5.90-12.05)                                             |
| Pancreatitis                               | 2.81<br>(2.41-3.29)                         |                                                                        | 3.45<br>(3.12-3.82)               | 42.04<br>(38.06-46.59)                                           | 0.19<br>(0.11-0.30)               | 2.36<br>(1.39-3.70)                                              |
| Appendicitis                               | 17.70<br>(14.10-22.32)                      | 229.86<br>(180.88-291.00)                                              | 1.29<br>(1.03-1.47)               | 16.62<br>(13.29-18.96)                                           | 0.21<br>(0.14-0.30)               | 2.74<br>(1.76-3.93)                                              |
| Paralytic ileus and intestinal obstruction | 10.10<br>(9.75-10.44)                       | 127.24<br>(122.92-131.33)                                              | 6.91<br>(5.50-8.08)               | 91.18<br>(71.89-107.28)                                          | 0.17<br>(0.11-0.23)               | 2.28<br>(1.55-3.10)                                              |
| Vascular intestinal disorders              | 1.46<br>(1.26-1.65)                         | 18.23<br>(15.84-20.67)                                                 | 1.82<br>(1.66-1.98)               | 22.84<br>(20.83-24.96)                                           | 0.05<br>(0.03-0.07)               | 0.65<br>(0.44-0.90)                                              |

|                          |    |    |                     |                        |                     |                     |
|--------------------------|----|----|---------------------|------------------------|---------------------|---------------------|
| Other digestive diseases | NA | NA | 2.18<br>(1.83-2.46) | 28.92<br>(24.89-31.76) | 0.32<br>(0.22-0.43) | 4.07<br>(2.86-5.47) |
|--------------------------|----|----|---------------------|------------------------|---------------------|---------------------|

---

Abbreviations: NA, not available; SDI, Socio-demographic Index; UI, uncertainty interval.

**Supplementary Table 3** Disability-adjusted life-years (DALYs) and age-standardised DALY rate due to digestive diseases in 2019 for both sexes by location

| <b>Location</b>                                         | <b>Age-standardised DALY rate per 100,000 population</b> | <b>95% uncertainty intervals (age-standardised DALY rate)</b> | <b>DALYs, in thousands</b> | <b>95% uncertainty intervals (DALYs)</b> |
|---------------------------------------------------------|----------------------------------------------------------|---------------------------------------------------------------|----------------------------|------------------------------------------|
| <b>Global</b>                                           | 1096.99                                                  | (1002.19-1202.93 )                                            | 88991.77                   | (81413.80 -97583.80 )                    |
| <b>Central Europe, eastern Europe, and central Asia</b> | 1522.18                                                  | (1399.12-1670.12 )                                            | 8172.32                    | (7510.57 -8934.15 )                      |
| <b>Central Asia</b>                                     | 1827.87                                                  | (1659.55-2024.27 )                                            | 1615.95                    | (1458.62 -1799.79 )                      |
| Armenia                                                 | 1191.47                                                  | (1024.80-1365.71 )                                            | 45.28                      | (38.85 -52.07 )                          |
| Azerbaijan                                              | 1355.69                                                  | (1152.56-1600.73 )                                            | 136.73                     | (116.12 -162.97 )                        |
| Georgia                                                 | 1402.03                                                  | (1197.47-1607.87 )                                            | 68.10                      | (58.13 -78.01 )                          |
| Kazakhstan                                              | 1717.00                                                  | (1477.71-2076.18 )                                            | 326.98                     | (279.86 -397.74 )                        |
| Kyrgyzstan                                              | 1756.86                                                  | (1556.82-1977.68 )                                            | 101.28                     | (89.64 -114.20 )                         |
| Mongolia                                                | 2731.15                                                  | (2202.64-3420.59 )                                            | 79.67                      | (63.39 -100.39 )                         |
| Tajikistan                                              | 1603.65                                                  | (1337.62-1918.74 )                                            | 117.06                     | (97.64 -140.34 )                         |
| Turkmenistan                                            | 2368.94                                                  | (1961.34-2903.24 )                                            | 116.71                     | (96.55 -143.15 )                         |
| Uzbekistan                                              | 2133.56                                                  | (1834.73-2488.83 )                                            | 624.15                     | (533.26 -731.50 )                        |
| <b>Central Europe</b>                                   | 1100.47                                                  | (966.13-1241.20 )                                             | 1895.69                    | (1669.10 -2127.18 )                      |
| Albania                                                 | 567.46                                                   | (462.43-689.47 )                                              | 19.44                      | (15.67 -23.94 )                          |
| Bosnia and Herzegovina                                  | 762.91                                                   | (623.20-923.66 )                                              | 38.77                      | (31.62 -47.05 )                          |
| Bulgaria                                                | 1281.70                                                  | (1045.07-1554.49 )                                            | 138.91                     | (112.99 -168.15 )                        |
| Croatia                                                 | 897.56                                                   | (731.13-1082.51 )                                             | 62.55                      | (51.21 -75.14 )                          |
| Czechia                                                 | 895.75                                                   | (747.99-1061.79 )                                             | 147.77                     | (123.77 -174.82 )                        |
| Hungary                                                 | 1269.02                                                  | (1062.81-1489.21 )                                            | 194.78                     | (164.07 -228.25 )                        |
| Montenegro                                              | 658.87                                                   | (553.16-799.41 )                                              | 5.59                       | (4.69 -6.75 )                            |
| North Macedonia                                         | 728.05                                                   | (599.06-880.14 )                                              | 21.14                      | (17.34 -25.80 )                          |
| Poland                                                  | 1032.81                                                  | (874.30-1210.55 )                                             | 579.38                     | (489.85 -677.59 )                        |
| Romania                                                 | 1500.95                                                  | (1268.79-1781.88 )                                            | 443.34                     | (374.77 -525.95 )                        |
| Serbia                                                  | 864.99                                                   | (713.10-1043.16 )                                             | 116.17                     | (96.02 -139.75 )                         |
| Slovakia                                                | 1241.80                                                  | (995.88-1555.08 )                                             | 97.94                      | (78.67 -122.76 )                         |
| Slovenia                                                | 864.30                                                   | (697.49-1078.43 )                                             | 29.92                      | (24.43 -37.37 )                          |
| <b>Eastern Europe</b>                                   | 1651.18                                                  | (1480.22-1844.63 )                                            | 4660.68                    | (4188.63 -5200.98 )                      |
| Belarus                                                 | 1156.63                                                  | (939.59-1448.37 )                                             | 152.56                     | (123.86 -190.50 )                        |
| Estonia                                                 | 987.15                                                   | (805.09-1202.64 )                                             | 18.81                      | (15.39 -23.00 )                          |
| Latvia                                                  | 1069.09                                                  | (903.25-1256.41 )                                             | 30.30                      | (25.70 -35.60 )                          |
| Lithuania                                               | 1447.22                                                  | (1215.15-1729.25 )                                            | 59.31                      | (49.81 -70.77 )                          |
| Republic of Moldova                                     | 2181.73                                                  | (1920.76-2457.64 )                                            | 114.77                     | (100.80 -129.10 )                        |
| Russian Federation                                      | 1579.40                                                  | (1382.58-1801.80 )                                            | 3108.30                    | (2728.17 -3549.47 )                      |
| Ukraine                                                 | 2007.17                                                  | (1713.04-2356.30 )                                            | 1176.63                    | (1004.33 -1377.25 )                      |
| <b>High income</b>                                      | 686.34                                                   | (624.54-764.67 )                                              | 11519.07                   | (10555.38 -12623.70 )                    |
| <b>Australasia</b>                                      | 471.87                                                   | (414.16-544.76 )                                              | 196.22                     | (174.53 -222.06 )                        |
| Australia                                               | 474.11                                                   | (417.35-545.27 )                                              | 166.49                     | (148.21 -188.12 )                        |

|                                    |         |                    |         |                     |
|------------------------------------|---------|--------------------|---------|---------------------|
| New Zealand                        | 461.67  | (392.46-551.72 )   | 29.73   | (25.80 -34.85 )     |
| <b>High-income Asia Pacific</b>    | 566.92  | (491.78-650.77 )   | 1843.64 | (1635.46 -2063.38 ) |
| Brunei Darussalam                  | 747.05  | (644.70-856.34 )   | 2.76    | (2.34 -3.20 )       |
| Japan                              | 547.23  | (470.73-634.77 )   | 1302.46 | (1143.27 -1461.36 ) |
| Republic of Korea                  | 645.95  | (565.45-738.19 )   | 512.62  | (453.08 -582.02 )   |
| Singapore                          | 355.90  | (297.75-431.79 )   | 25.80   | (21.66 -31.18 )     |
| <b>High-income North America</b>   | 772.53  | (711.01-851.74 )   | 3999.01 | (3715.47 -4356.95 ) |
| Canada                             | 584.64  | (520.12-659.06 )   | 330.57  | (298.46 -367.33 )   |
| Greenland                          | 1127.49 | (929.32-1369.56 )  | 0.78    | (0.64 -0.95 )       |
| United States of America           | 794.44  | (732.92-873.74 )   | 3667.59 | (3408.83 -3990.29 ) |
| <b>Southern Latin America</b>      | 965.63  | (888.72-1064.68 )  | 757.57  | (699.87 -831.96 )   |
| Argentina                          | 953.24  | (873.46-1055.94 )  | 486.29  | (448.17 -537.15 )   |
| Chile                              | 1032.03 | (949.41-1133.06 )  | 235.91  | (217.54 -256.99 )   |
| Uruguay                            | 748.37  | (675.02-841.14 )   | 35.34   | (32.19 -39.20 )     |
| <b>Western Europe</b>              | 652.28  | (589.37-731.34 )   | 4722.63 | (4315.93 -5176.79 ) |
| Andorra                            | 542.21  | (431.22-671.75 )   | 0.71    | (0.56 -0.88 )       |
| Austria                            | 673.55  | (595.49-767.96 )   | 94.48   | (84.55 -105.65 )    |
| Belgium                            | 640.59  | (579.54-713.52 )   | 120.78  | (110.47 -131.91 )   |
| Cyprus                             | 483.39  | (422.64-555.12 )   | 8.44    | (7.36 -9.69 )       |
| Denmark                            | 685.50  | (615.56-767.94 )   | 63.68   | (57.83 -70.01 )     |
| Finland                            | 788.04  | (716.95-873.06 )   | 68.86   | (63.01 -75.33 )     |
| France                             | 565.42  | (511.55-628.71 )   | 616.28  | (562.07 -672.07 )   |
| Germany                            | 742.25  | (676.51-816.27 )   | 1105.17 | (1018.08 -1198.64 ) |
| Greece                             | 469.63  | (412.15-547.83 )   | 87.73   | (78.34 -99.53 )     |
| Iceland                            | 354.88  | (305.37-411.01 )   | 1.68    | (1.46 -1.92 )       |
| Ireland                            | 465.49  | (413.42-533.31 )   | 31.00   | (27.73 -35.02 )     |
| Israel                             | 446.77  | (393.29-513.09 )   | 48.18   | (42.86 -54.81 )     |
| Italy                              | 643.64  | (553.39-751.80 )   | 700.55  | (618.49 -791.37 )   |
| Luxembourg                         | 610.19  | (530.82-700.44 )   | 5.48    | (4.82 -6.26 )       |
| Malta                              | 429.32  | (371.34-494.70 )   | 3.08    | (2.71 -3.50 )       |
| Netherlands                        | 437.86  | (394.15-490.99 )   | 127.79  | (116.26 -140.93 )   |
| Norway                             | 509.64  | (431.21-606.07 )   | 40.34   | (34.75 -46.83 )     |
| Portugal                           | 624.49  | (570.54-690.10 )   | 117.54  | (108.33 -127.99 )   |
| Monaco                             | 559.06  | (452.05-669.93 )   | 0.39    | (0.32 -0.46 )       |
| San Marino                         | 550.24  | (401.99-752.90 )   | 0.30    | (0.22 -0.41 )       |
| Spain                              | 551.46  | (499.74-614.23 )   | 453.57  | (414.41 -494.92 )   |
| Sweden                             | 465.66  | (409.76-534.64 )   | 76.63   | (68.42 -85.86 )     |
| Switzerland                        | 426.62  | (381.35-476.14 )   | 62.98   | (56.48 -69.30 )     |
| United Kingdom                     | 889.15  | (793.83-1008.37 )  | 882.86  | (796.49 -984.88 )   |
| <b>Latin America and Caribbean</b> | 1362.86 | (1220.83-1515.59 ) | 8175.63 | (7319.11 -9104.33 ) |
| <b>Andean Latin America</b>        | 1353.17 | (1117.75-1636.97 ) | 802.27  | (662.81 -972.61 )   |
| Ecuador                            | 1361.68 | (1107.89-1682.08 ) | 217.09  | (176.22 -269.04 )   |
| Peru                               | 1189.63 | (911.62-1568.40 )  | 394.88  | (303.39 -519.48 )   |

|                                     |         |                    |         |                     |
|-------------------------------------|---------|--------------------|---------|---------------------|
| Bolivia (Plurinational State of)    | 1915.20 | (1506.15-2368.25 ) | 190.29  | (149.54 -234.75 )   |
| <b>Caribbean</b>                    | 1246.12 | (1002.11-1490.81 ) | 618.87  | (502.09 -736.24 )   |
| Antigua and Barbuda                 | 841.57  | (714.65-986.03 )   | 0.85    | (0.72 -0.99 )       |
| Barbados                            | 828.53  | (690.39-992.11 )   | 3.42    | (2.86 -4.10 )       |
| Belize                              | 1251.08 | (1092.98-1425.54 ) | 4.27    | (3.72 -4.89 )       |
| Bermuda                             | 599.11  | (490.77-723.32 )   | 0.60    | (0.49 -0.72 )       |
| Bahamas                             | 1117.75 | (928.13-1352.61 )  | 4.61    | (3.81 -5.62 )       |
| Cuba                                | 834.80  | (691.76-1001.60 )  | 137.12  | (113.53 -164.17 )   |
| Dominica                            | 989.43  | (813.93-1201.68 )  | 0.80    | (0.66 -0.97 )       |
| Dominican Republic                  | 1400.15 | (1067.83-1786.31 ) | 141.91  | (107.62 -181.64 )   |
| Grenada                             | 1147.42 | (1017.84-1292.25 ) | 1.30    | (1.15 -1.46 )       |
| Guyana                              | 2080.92 | (1664.96-2564.57 ) | 14.98   | (11.94 -18.52 )     |
| Haiti                               | 1999.90 | (1263.16-2721.39 ) | 191.27  | (117.90 -267.33 )   |
| Jamaica                             | 695.04  | (561.93-848.24 )   | 20.47   | (16.53 -25.03 )     |
| Puerto Rico                         | 860.42  | (685.90-1064.22 )  | 45.65   | (36.57 -56.27 )     |
| Saint Kitts and Nevis               | 1194.24 | (948.51-1446.63 )  | 0.83    | (0.65 -1.00 )       |
| Saint Lucia                         | 965.12  | (817.59-1130.43 )  | 2.00    | (1.69 -2.34 )       |
| Saint Vincent and the Grenadines    | 1124.67 | (965.98-1299.01 )  | 1.46    | (1.26 -1.68 )       |
| Suriname                            | 1408.17 | (1177.38-1667.41 ) | 8.50    | (7.09 -10.06 )      |
| Trinidad and Tobago                 | 956.63  | (755.92-1201.31 )  | 16.21   | (12.77 -20.43 )     |
| United States Virgin Islands        | 1089.45 | (904.12-1286.56 )  | 1.67    | (1.39 -1.96 )       |
| <b>Central Latin America</b>        | 1571.99 | (1386.97-1788.67 ) | 3874.04 | (3413.09 -4405.84 ) |
| Venezuela (Bolivarian Republic of)  | 1055.97 | (838.23-1311.26 )  | 314.02  | (248.22 -390.68 )   |
| Colombia                            | 787.50  | (629.65-966.27 )   | 404.01  | (321.81 -495.48 )   |
| Costa Rica                          | 1100.28 | (893.09-1343.56 )  | 56.58   | (45.95 -69.20 )     |
| El Salvador                         | 1364.41 | (1087.96-1702.42 ) | 81.70   | (65.41 -101.85 )    |
| Guatemala                           | 2441.99 | (1971.58-3008.48 ) | 338.83  | (273.88 -416.21 )   |
| Honduras                            | 2725.29 | (2128.51-3422.48 ) | 198.61  | (157.01 -245.95 )   |
| Mexico                              | 1910.20 | (1655.10-2189.24 ) | 2364.01 | (2040.23 -2714.24 ) |
| Nicaragua                           | 1569.83 | (1314.33-1860.05 ) | 81.12   | (67.92 -96.54 )     |
| Panama                              | 844.73  | (680.16-1029.17 )  | 35.16   | (28.32 -42.93 )     |
| <b>Tropical Latin America</b>       | 1177.44 | (1075.26-1307.35 ) | 2880.45 | (2627.83 -3203.65 ) |
| Brazil                              | 1180.77 | (1078.77-1312.11 ) | 2815.96 | (2568.22 -3133.70 ) |
| Paraguay                            | 1051.01 | (838.66-1296.54 )  | 64.50   | (51.25 -79.37 )     |
| <b>North Africa and Middle East</b> | 995.00  | (796.21-1179.67 )  | 4841.61 | (3845.35 -5801.70 ) |
| Afghanistan                         | 1474.35 | (1062.19-1942.45 ) | 319.38  | (219.56 -434.25 )   |
| Algeria                             | 636.41  | (515.11-780.66 )   | 233.28  | (187.13 -289.65 )   |
| Bahrain                             | 786.84  | (631.24-982.38 )   | 8.66    | (6.77 -10.99 )      |
| Egypt                               | 2858.13 | (1898.97-3720.61 ) | 1873.91 | (1235.11 -2464.08 ) |
| Iraq                                | 570.39  | (460.58-697.31 )   | 177.24  | (142.32 -219.76 )   |

|                                                   |         |                    |          |                       |
|---------------------------------------------------|---------|--------------------|----------|-----------------------|
| Iran (Islamic Republic of)                        | 549.52  | (473.15-649.07 )   | 438.71   | (374.27 -522.11 )     |
| Jordan                                            | 585.78  | (480.78-697.96 )   | 47.55    | (38.61 -58.17 )       |
| Kuwait                                            | 461.27  | (384.74-558.24 )   | 17.32    | (14.02 -21.73 )       |
| Lebanon                                           | 568.84  | (411.23-776.32 )   | 29.82    | (21.47 -40.73 )       |
| Libya                                             | 684.68  | (511.67-892.08 )   | 40.60    | (29.69 -52.83 )       |
| Morocco                                           | 752.30  | (610.13-892.58 )   | 244.82   | (196.13 -295.53 )     |
| Palestine                                         | 694.87  | (587.67-811.22 )   | 20.95    | (17.62 -25.03 )       |
| Oman                                              | 661.09  | (525.19-837.92 )   | 18.29    | (13.52 -24.58 )       |
| Qatar                                             | 906.94  | (695.60-1199.31 )  | 12.48    | (9.27 -16.52 )        |
| Saudi Arabia                                      | 861.37  | (695.06-1037.85 )  | 198.77   | (155.36 -247.52 )     |
| Sudan                                             | 975.59  | (695.80-1397.24 )  | 262.40   | (190.84 -364.13 )     |
| Syrian Arab Republic                              | 718.45  | (543.20-909.44 )   | 92.84    | (69.99 -118.38 )      |
| Tunisia                                           | 566.49  | (427.66-766.12 )   | 69.78    | (52.44 -94.57 )       |
| Turkey                                            | 550.16  | (448.62-674.97 )   | 481.14   | (389.84 -594.23 )     |
| United Arab Emirates                              | 606.87  | (461.44-787.68 )   | 44.36    | (32.84 -58.86 )       |
| Yemen                                             | 1073.17 | (809.03-1419.55 )  | 204.37   | (154.78 -262.42 )     |
| <b>South Asia</b>                                 | 1422.01 | (1259.87-1611.05 ) | 23225.08 | (20533.08 -26276.67 ) |
| Bangladesh                                        | 1146.02 | (965.49-1394.54 )  | 1674.98  | (1404.06 -2033.38 )   |
| Bhutan                                            | 1550.20 | (1100.85-2762.65 ) | 10.30    | (7.22 -18.29 )        |
| India                                             | 1421.21 | (1237.02-1628.55 ) | 18467.79 | (16032.08 -21139.51 ) |
| Nepal                                             | 1585.15 | (1205.17-2099.86 ) | 403.13   | (307.73 -532.95 )     |
| Pakistan                                          | 1677.09 | (1300.74-2220.26 ) | 2668.88  | (2082.21 -3491.25 )   |
| <b>Southeast Asia, east Asia,<br/>and Oceania</b> | 770.32  | (691.79-848.87 )   | 19779.57 | (17738.64 -21855.47 ) |
| <b>East Asia</b>                                  | 551.10  | (476.11-627.28 )   | 10616.91 | (9139.05 -12123.52 )  |
| China                                             | 538.73  | (463.28-615.65 )   | 10017.88 | (8549.91 -11496.36 )  |
| Democratic People's Republic<br>of Korea          | 917.56  | (643.72-1169.12 )  | 289.28   | (197.50 -370.33 )     |
| Taiwan (Province of China)                        | 878.52  | (710.34-1100.30 )  | 309.75   | (248.94 -388.33 )     |
| <b>Oceania</b>                                    | 972.14  | (805.16-1172.85 )  | 99.83    | (81.75 -121.26 )      |
| American Samoa                                    | 909.95  | (750.32-1090.47 )  | 0.46     | (0.38 -0.56 )         |
| Cook Islands                                      | 603.82  | (495.94-737.13 )   | 0.13     | (0.11 -0.16 )         |
| Micronesia (Federated States<br>of)               | 1491.13 | (905.88-2216.33 )  | 1.27     | (0.74 -1.94 )         |
| Fiji                                              | 810.74  | (641.32-1007.98 )  | 6.72     | (5.30 -8.44 )         |
| Guam                                              | 804.05  | (677.31-946.87 )   | 1.47     | (1.23 -1.73 )         |
| Kiribati                                          | 2278.18 | (1475.57-3222.87 ) | 2.03     | (1.22 -2.96 )         |
| Marshall Islands                                  | 1512.45 | (982.12-2169.32 )  | 0.69     | (0.44 -1.01 )         |
| Northern Mariana Islands                          | 1182.76 | (988.41-1412.46 )  | 0.63     | (0.52 -0.74 )         |
| Papua New Guinea                                  | 874.75  | (690.36-1108.02 )  | 66.28    | (51.92 -85.15 )       |
| Nauru                                             | 1537.91 | (992.25-2140.98 )  | 0.11     | (0.07 -0.16 )         |
| Niue                                              | 989.69  | (755.35-1280.77 )  | 0.02     | (0.02 -0.03 )         |
| Palau                                             | 988.32  | (658.55-1378.48 )  | 0.22     | (0.14 -0.31 )         |
| Samoa                                             | 1120.52 | (852.88-1431.56 )  | 1.87     | (1.41 -2.41 )         |

|                                   |         |                    |          |                       |
|-----------------------------------|---------|--------------------|----------|-----------------------|
| Solomon Islands                   | 1765.17 | (1437.26-2116.72 ) | 8.47     | (6.84 -10.26 )        |
| Tokelau                           | 948.60  | (729.78-1218.01 )  | 0.01     | (0.01 -0.02 )         |
| Tonga                             | 1297.30 | (1028.55-1603.89 ) | 1.11     | (0.88 -1.37 )         |
| Tuvalu                            | 1278.80 | (893.12-1770.85 )  | 0.14     | (0.10 -0.19 )         |
| Vanuatu                           | 1615.20 | (1077.76-2204.48 ) | 3.48     | (2.34 -4.78 )         |
| <b>Southeast Asia</b>             | 1376.47 | (1235.86-1523.75 ) | 9062.84  | (8106.34 -10089.77 )  |
| Cambodia                          | 2937.01 | (2391.93-3500.65 ) | 407.79   | (331.49 -490.74 )     |
| Indonesia                         | 1737.19 | (1510.33-1967.33 ) | 4036.40  | (3468.61 -4646.49 )   |
| Lao Peoples's Democratic Republic | 1606.43 | (1198.78-2108.10 ) | 86.47    | (64.38 -113.34 )      |
| Malaysia                          | 1031.19 | (832.32-1258.64 )  | 287.90   | (231.64 -355.04 )     |
| Maldives                          | 482.56  | (405.69-563.65 )   | 2.02     | (1.70 -2.40 )         |
| Mauritius                         | 829.63  | (692.10-989.37 )   | 13.53    | (11.24 -16.28 )       |
| Myanmar                           | 1881.87 | (1508.08-2329.64 ) | 1026.87  | (815.06 -1273.29 )    |
| Philippines                       | 1096.60 | (923.52-1301.89 )  | 1013.15  | (854.16 -1205.10 )    |
| Sri Lanka                         | 721.87  | (564.19-917.39 )   | 179.19   | (139.41 -228.94 )     |
| Seychelles                        | 1386.66 | (1192.02-1580.21 ) | 1.63     | (1.39 -1.87 )         |
| Viet Nam                          | 1003.74 | (806.02-1228.18 )  | 1012.76  | (806.66 -1259.00 )    |
| Thailand                          | 1019.92 | (802.56-1292.65 )  | 969.44   | (754.40 -1233.88 )    |
| Timor-Leste                       | 1513.67 | (983.72-2185.96 )  | 13.83    | (8.62 -19.68 )        |
| <b>Sub-Saharan Africa</b>         | 1925.55 | (1639.92-2252.90 ) | 13278.48 | (11044.91 -15915.54 ) |
| <b>Central sub-Saharan Africa</b> | 2010.42 | (1577.63-2506.31 ) | 1626.12  | (1259.51 -2080.99 )   |
| Angola                            | 2176.16 | (1742.73-2698.78 ) | 380.61   | (285.07 -490.62 )     |
| Central African Republic          | 2814.31 | (1994.97-3886.18 ) | 92.65    | (63.13 -131.06 )      |
| Congo                             | 1860.70 | (1361.35-2368.50 ) | 66.55    | (47.97 -87.94 )       |
| Democratic Republic of the Congo  | 1938.72 | (1457.47-2480.81 ) | 1054.48  | (799.96 -1409.11 )    |
| Equatorial Guinea                 | 1319.21 | (947.57-1850.15 )  | 10.08    | (6.91 -14.63 )        |
| Gabon                             | 1664.11 | (1277.41-2085.89 ) | 21.75    | (16.45 -28.05 )       |
| <b>Eastern sub-Saharan Africa</b> | 2065.98 | (1804.74-2398.21 ) | 4941.05  | (4214.88 -5827.01 )   |
| Burundi                           | 2112.22 | (1583.41-2960.27 ) | 145.41   | (109.17 -203.69 )     |
| Comoros                           | 1762.70 | (1343.19-2237.19 ) | 9.95     | (7.39 -12.75 )        |
| Djibouti                          | 1690.51 | (1154.78-2551.51 ) | 14.26    | (9.58 -21.58 )        |
| Eritrea                           | 2519.10 | (1942.26-3276.83 ) | 101.33   | (75.63 -134.43 )      |
| Ethiopia                          | 2184.92 | (1808.49-2653.33 ) | 1298.79  | (1059.99 -1605.21 )   |
| Kenya                             | 2507.50 | (1841.17-3486.78 ) | 735.86   | (540.67 -1019.17 )    |
| Madagascar                        | 1830.57 | (1406.64-2375.38 ) | 298.14   | (229.78 -388.30 )     |
| Malawi                            | 2166.76 | (1784.78-2624.75 ) | 230.80   | (187.19 -282.34 )     |
| Mozambique                        | 1740.44 | (1386.69-2172.28 ) | 317.23   | (243.40 -403.98 )     |
| Rwanda                            | 2007.87 | (1607.10-2514.05 ) | 166.51   | (128.16 -215.49 )     |
| Somalia                           | 2371.31 | (1644.47-3363.68 ) | 261.59   | (178.30 -372.27 )     |
| South Sudan                       | 1906.44 | (1355.53-2874.39 ) | 107.63   | (77.36 -162.59 )      |
| United Republic of Tanzania       | 1626.46 | (1303.97-1986.60 ) | 603.32   | (487.01 -750.72 )     |
| Uganda                            | 1722.50 | (1412.76-2075.22 ) | 378.62   | (300.87 -470.98 )     |

|                                   |                    |                    |                    |                     |                   |
|-----------------------------------|--------------------|--------------------|--------------------|---------------------|-------------------|
| Zambia                            | 2539.15            | (1988.30-3251.77 ) | 267.67             | (201.37 -354.23 )   |                   |
| <b>Southern Africa</b>            | <b>sub-Saharan</b> | 1167.53            | (1047.65-1298.34 ) | 787.27              | (700.00 -882.83 ) |
| Botswana                          | 1700.78            | (1265.07-2220.33 ) | 31.65              | (23.12 -42.28 )     |                   |
| Lesotho                           | 2074.53            | (1516.38-2733.21 ) | 32.84              | (23.46 -43.46 )     |                   |
| Namibia                           | 1525.34            | (1154.58-1982.45 ) | 26.67              | (19.65 -35.21 )     |                   |
| South Africa                      | 976.49             | (871.18-1092.19 )  | 501.16             | (446.18 -563.18 )   |                   |
| Eswatini                          | 1786.09            | (1319.66-2393.63 ) | 14.13              | (10.28 -19.01 )     |                   |
| Zimbabwe                          | 1853.60            | (1253.64-2427.25 ) | 180.83             | (122.70 -239.03 )   |                   |
| <b>Western sub-Saharan Africa</b> | 1982.79            | (1581.80-2480.49 ) | 5924.04            | (4639.64 -7472.50 ) |                   |
| Benin                             | 1885.96            | (1458.38-2461.63 ) | 150.26             | (111.72 -199.95 )   |                   |
| Burkina Faso                      | 1858.22            | (1398.69-2379.60 ) | 291.26             | (216.11 -375.46 )   |                   |
| Cameroon                          | 1658.57            | (1128.97-2255.69 ) | 306.14             | (204.04 -418.17 )   |                   |
| Chad                              | 2371.08            | (1894.29-2929.11 ) | 225.54             | (178.65 -279.34 )   |                   |
| Ghana                             | 1810.88            | (1454.23-2214.33 ) | 408.61             | (322.44 -500.96 )   |                   |
| Guinea                            | 1962.07            | (1448.99-2557.79 ) | 163.20             | (116.76 -218.24 )   |                   |
| Guinea-Bissau                     | 2717.44            | (2064.73-3445.21 ) | 30.84              | (23.28 -39.53 )     |                   |
| Liberia                           | 1975.93            | (1400.69-2735.53 ) | 63.14              | (42.58 -92.92 )     |                   |
| Mali                              | 1969.62            | (1487.49-2584.68 ) | 278.40             | (197.45 -385.62 )   |                   |
| Mauritania                        | 1409.69            | (1010.92-1930.70 ) | 37.79              | (25.84 -54.03 )     |                   |
| Niger                             | 2177.59            | (1646.13-2881.07 ) | 299.12             | (217.03 -410.24 )   |                   |
| Nigeria                           | 2116.08            | (1392.64-3131.13 ) | 2977.41            | (1939.14 -4448.35 ) |                   |
| Cape Verde                        | 1189.74            | (1013.67-1407.04 ) | 5.86               | (4.97 -6.98 )       |                   |
| Côte d'Ivoire                     | 1702.13            | (1247.75-2214.43 ) | 290.05             | (209.33 -380.84 )   |                   |
| The Gambia                        | 1785.23            | (1354.32-2257.25 ) | 24.36              | (18.77 -30.48 )     |                   |
| Sao Tome and Principe             | 1743.42            | (1392.57-2423.77 ) | 2.48               | (1.97 -3.48 )       |                   |
| Senegal                           | 1676.14            | (1219.12-2225.91 ) | 170.62             | (122.90 -230.96 )   |                   |
| Sierra Leone                      | 1804.67            | (1324.49-2382.94 ) | 102.55             | (72.48 -140.47 )    |                   |
| Togo                              | 1814.70            | (1394.98-2285.04 ) | 96.31              | (72.34 -121.86 )    |                   |

---

Note: North Africa & Middle East and South Asia are both super-regions and regions.



**Supplementary Table 4** Temporal trend in various age-standardised rates of digestive diseases globally and in 204 countries or territories from 1990 to 2019

| Location                                                | EAPC of age-standardised prevalence (95% CI) | of rate          | EAPC of age-standardised incidence (95% CI) | of rate | EAPC of age-standardised mortality (95% CI) | of rate          | EAPC of age-standardised YLL rate (95% CI) | of rate (95% CI) | EAPC of age-standardised YLD rate (95% CI) | of rate (95% CI) | EAPC of age-standardised DALY rate (95% CI) | of rate (95% CI) |
|---------------------------------------------------------|----------------------------------------------|------------------|---------------------------------------------|---------|---------------------------------------------|------------------|--------------------------------------------|------------------|--------------------------------------------|------------------|---------------------------------------------|------------------|
| <b>Global</b>                                           | -0.02 (0.02)                                 | (-0.07 to 0.09)  | (0.05 to 0.12)                              |         | -1.38 (-1.31)                               | (-1.44 to 1.07)  | -1.51 (-1.44)                              | (-1.57 to 0.91)  | -0.38 (-0.33)                              | (-0.44 to 0.70)  | -1.32 (-1.27)                               | (-1.36 to 1.08)  |
| <b>Central Europe, eastern Europe, and central Asia</b> | 0.02 (0.04)                                  | (0.00 to 0.01)   | (-0.07 to 0.01)                             |         | 0.72 (1.07)                                 | (0.37 to 1.36)   | 0.91 (1.36)                                | (0.45 to 1.36)   | -0.24 (-0.21)                              | (-0.27 to 0.70)  | 0.70 (1.08)                                 | (0.33 to 1.08)   |
| <b>Central Asia</b>                                     | -0.04 (-0.02)                                | (-0.06 to 0.07)  | (0.06 to 0.09)                              |         | 0.79 (1.16)                                 | (0.43 to 0.97)   | 0.57 (0.97)                                | (0.16 to 0.97)   | 0.01 (0.03)                                | (0.00 to 0.85)   | 0.50 (0.85)                                 | (0.14 to 0.85)   |
| Armenia                                                 | 0.13 (0.13)                                  | (0.12 to 0.18)   | (0.16 to 0.20)                              |         | 1.86 (2.36)                                 | (1.37 to 2.36)   | 0.77 (1.21)                                | (0.32 to 1.21)   | 0.19 (0.25)                                | (0.14 to 1.02)   | 0.65 (1.02)                                 | (0.29 to 1.02)   |
| Azerbaijan                                              | 0.00 (0.02)                                  | (-0.02 to 0.07)  | (0.05 to 0.09)                              |         | -0.23 (0.19)                                | (-0.64 to 0.19)  | -0.98 (-0.63)                              | (-1.33 to -0.63) | -0.09 (-0.06)                              | (-0.12 to -0.86) | -0.86 (-0.56)                               | (-1.16 to -0.56) |
| Georgia                                                 | 0.05 (0.08)                                  | (0.03 to 0.16)   | (0.13 to 0.19)                              |         | 0.56 (0.82)                                 | (0.31 to 0.82)   | 0.61 (0.85)                                | (0.37 to 0.85)   | 0.52 (0.63)                                | (0.42 to 0.81)   | 0.60 (0.81)                                 | (0.38 to 0.81)   |
| Kazakhstan                                              | -0.12 (-0.10)                                | (-0.14 to 0.05)  | (0.04 to 0.06)                              |         | 1.54 (2.04)                                 | (1.04 to 2.04)   | 1.54 (2.22)                                | (0.86 to 2.22)   | -0.11 (-0.05)                              | (-0.17 to 1.31)  | 1.31 (1.91)                                 | (0.71 to 1.91)   |
| Kyrgyzstan                                              | -0.10 (-0.08)                                | (-0.11 to 0.06)  | (0.04 to 0.08)                              |         | 0.25 (0.82)                                 | (-0.32 to 0.82)  | 0.27 (0.87)                                | (-0.33 to 0.87)  | 0.00 (0.03)                                | (-0.03 to 0.24)  | 0.24 (0.77)                                 | (-0.29 to 0.77)  |
| Mongolia                                                | -0.30 (-0.26)                                | (-0.34 to -0.09) | (-0.12 to -0.07)                            |         | -0.59 (-0.37)                               | (-0.81 to -0.37) | -1.42 (-1.26)                              | (-1.57 to -1.26) | -0.80 (-0.73)                              | (-0.87 to -1.37) | -1.37 (-1.22)                               | (-1.51 to -1.22) |
| Tajikistan                                              | -0.13 (-0.11)                                | (-0.14 to 0.06)  | (0.05 to 0.08)                              |         | 0.47 (0.71)                                 | (0.23 to 0.71)   | -0.35 (-0.19)                              | (-0.51 to -0.19) | 0.05 (0.09)                                | (0.01 to -0.30)  | -0.30 (-0.17)                               | (-0.44 to -0.17) |
| Turkmenistan                                            | -0.02 (0.00)                                 | (-0.04 to 0.09)  | (0.07 to 0.10)                              |         | 0.66 (0.91)                                 | (0.41 to 0.91)   | 1.11 (1.36)                                | (0.86 to 1.36)   | 0.09 (0.12)                                | (0.06 to 1.01)   | 1.01 (1.23)                                 | (0.79 to 1.23)   |
| Uzbekistan                                              | -0.09 (-0.07)                                | (-0.11 to 0.10)  | (0.09 to 0.12)                              |         | 0.82 (1.45)                                 | (0.20 to 1.45)   | 0.54 (1.15)                                | (-0.07 to 1.15)  | 0.07 (0.09)                                | (0.05 to 0.48)   | 0.48 (1.03)                                 | (-0.07 to 1.03)  |
| <b>Central Europe</b>                                   | -0.06 (-0.05)                                | (-0.07 to 0.02)  | (-0.01 to 0.05)                             |         | -1.22 (-1.08)                               | (-1.35 to -1.08) | -1.47 (-1.30)                              | (-1.64 to -1.30) | -0.47 (-0.44)                              | (-0.50 to -1.25) | -1.25 (-1.12)                               | (-1.38 to -1.12) |
| Albania                                                 | 0.06 (0.08)                                  | (0.03 to 0.16)   | (0.14 to 0.18)                              |         | -2.77 (-2.37)                               | (-3.17 to -2.37) | -3.44 (-2.90)                              | (-3.97 to -2.90) | -0.18 (-0.13)                              | (-0.23 to -2.46) | -2.46 (-2.05)                               | (-2.88 to -2.05) |
| Bosnia and Herzegovina                                  | 0.17 (0.19)                                  | (0.16 to 0.09)   | (0.08 to 0.10)                              |         | -1.88 (-1.63)                               | (-2.12 to -1.63) | -2.30 (-2.02)                              | (-2.58 to -2.02) | -0.40 (-0.34)                              | (-0.46 to -1.76) | -1.76 (-1.53)                               | (-1.99 to -1.53) |
| Bulgaria                                                | -0.28 (-0.25)                                | (-0.30 to 0.00)  | (-0.02 to 0.02)                             |         | 0.08 (0.26)                                 | (-0.10 to 0.26)  | 0.09 (0.29)                                | (-0.11 to 0.29)  | -0.37 (-0.32)                              | (-0.41 to 0.01)  | -0.01 (0.15)                                | (-0.17 to 0.15)  |
| Croatia                                                 | 0.00 (0.02)                                  | (-0.02 to 0.08)  | (0.05 to 0.11)                              |         | -2.01 (-1.83)                               | (-2.18 to -1.83) | -2.64 (-2.44)                              | (-2.84 to -2.44) | -0.08 (-0.01)                              | (-0.14 to -2.03) | -2.03 (-1.88)                               | (-2.18 to -1.88) |
| Czechia                                                 | 0.01 (0.03)                                  | (0.00 to 0.12)   | (0.10 to 0.14)                              |         | -1.08 (-0.92)                               | (-1.23 to -0.92) | -1.28 (-1.13)                              | (-1.43 to -1.13) | 0.01 (0.07)                                | (-0.04 to -0.95) | -0.95 (-0.83)                               | (-1.06 to -0.83) |
| Hungary                                                 | -0.07 (-0.08)                                | (-0.08 to 0.01)  | (0.00 to 0.01)                              |         | -3.08 (-3.40)                               | (-3.40 to -3.40) | -3.88 (-4.28)                              | (-4.28 to -4.28) | -0.12 (-0.15)                              | (-0.15 to -3.26) | -3.26 (-3.60)                               | (-3.60 to -3.60) |

|                                 |        |        |        |       |        |    |        |        |        |       |        |    |       |        |    |       |        |    |
|---------------------------------|--------|--------|--------|-------|--------|----|--------|--------|--------|-------|--------|----|-------|--------|----|-------|--------|----|
|                                 | -0.05) |        | 0.02)  |       | -2.77) |    | -3.48) |        | -0.10) |       | -2.92) |    |       |        |    |       |        |    |
| Montenegro                      | 0.07   | (0.05  | to     | 0.09  | (0.07  | to | -0.08  | (-0.26 | to     | -0.45 | (-0.66 | to | 0.01  | (-0.01 | to | -0.29 | (-0.42 | to |
|                                 | 0.08)  |        | 0.11)  |       | 0.10)  |    | -0.24) |        | 0.03)  |       | -0.15) |    |       |        |    |       |        |    |
| North Macedonia                 | 0.04   | (0.04  | to     | 0.09  | (0.08  | to | -0.59  | (-0.70 | to     | -1.08 | (-1.17 | to | -0.19 | (-0.22 | to | -0.80 | (-0.87 | to |
|                                 | 0.05)  |        | 0.10)  |       | -0.47) |    | -0.98) |        | -0.15) |       | -0.74) |    |       |        |    |       |        |    |
| Poland                          | -0.14  | (-0.17 | to     | -0.19 | (-0.26 | to | -0.82  | (-0.97 | to     | -0.45 | (-0.65 | to | -1.13 | (-1.20 | to | -0.63 | (-0.78 | to |
|                                 | -0.11) |        | -0.12) |       | -0.67) |    | -0.24) |        | -1.05) |       | -0.48) |    |       |        |    |       |        |    |
| Romania                         | 0.01   | (0.00  | to     | 0.12  | (0.10  | to | -0.74  | (-1.03 | to     | -1.08 | (-1.41 | to | -0.18 | (-0.22 | to | -0.94 | (-1.21 | to |
|                                 | 0.02)  |        | 0.14)  |       | -0.46) |    | -0.75) |        | -0.14) |       | -0.66) |    |       |        |    |       |        |    |
| Serbia                          | 0.06   | (0.06  | to     | 0.26  | (0.23  | to | -0.29  | (-0.50 | to     | -1.02 | (-1.21 | to | 0.17  | (0.11  | to | -0.72 | (-0.86 | to |
|                                 | 0.07)  |        | 0.29)  |       | -0.09) |    | -0.84) |        | 0.23)  |       | -0.57) |    |       |        |    |       |        |    |
| Slovakia                        | -0.14  | (-0.16 | to     | 0.00  | (-0.01 | to | -0.60  | (-0.84 | to     | -0.95 | (-1.21 | to | -0.37 | (-0.41 | to | -0.82 | (-1.02 | to |
|                                 | -0.12) |        | 0.02)  |       | -0.36) |    | -0.69) |        | -0.32) |       | -0.62) |    |       |        |    |       |        |    |
| Slovenia                        | 0.07   | (0.03  | to     | 0.13  | (0.08  | to | -2.62  | (-2.90 | to     | -3.25 | (-3.57 | to | -0.09 | (-0.19 | to | -2.53 | (-2.77 | to |
|                                 | 0.10)  |        | 0.18)  |       | -2.33) |    | -2.93) |        | 0.00)  |       | -2.28) |    |       |        |    |       |        |    |
| <b>Eastern Europe</b>           | 0.04   | (0.01  | to     | -0.03 | (-0.11 | to | 1.77   | (1.24  | to     | 2.16  | (1.47  | to | -0.10 | (-0.15 | to | 1.76  | (1.19  | to |
|                                 | 0.06)  |        | 0.04)  |       | 2.31)  |    | 2.86)  |        | -0.05) |       | 2.33)  |    |       |        |    |       |        |    |
| Belarus                         | 0.03   | (0.02  | to     | 0.09  | (0.06  | to | 1.66   | (0.99  | to     | 2.01  | (1.16  | to | -0.04 | (-0.08 | to | 1.48  | (0.83  | to |
|                                 | 0.04)  |        | 0.11)  |       | 2.33)  |    | 2.87)  |        | -0.01) |       | 2.13)  |    |       |        |    |       |        |    |
| Estonia                         | 0.06   | (0.05  | to     | 0.06  | (0.05  | to | -0.11  | (-0.66 | to     | -0.09 | (-0.72 | to | -0.14 | (-0.16 | to | -0.11 | (-0.58 | to |
|                                 | 0.07)  |        | 0.07)  |       | 0.44)  |    | 0.55)  |        | -0.11) |       | 0.37)  |    |       |        |    |       |        |    |
| Latvia                          | 0.01   | (-0.01 | to     | 0.07  | (0.02  | to | 0.19   | (-0.28 | to     | 0.30  | (-0.26 | to | -0.09 | (-0.20 | to | 0.19  | (-0.24 | to |
|                                 | 0.04)  |        | 0.12)  |       | 0.66)  |    | 0.86)  |        | 0.02)  |       | 0.62)  |    |       |        |    |       |        |    |
| Lithuania                       | 0.08   | (0.04  | to     | 0.11  | (0.06  | to | 2.66   | (1.94  | to     | 2.82  | (1.97  | to | 0.15  | (0.05  | to | 2.15  | (1.48  | to |
|                                 | 0.13)  |        | 0.17)  |       | 3.38)  |    | 3.68)  |        | 0.26)  |       | 2.82)  |    |       |        |    |       |        |    |
| Republic of Moldova             | -0.03  | (-0.04 | to     | -0.03 | (-0.04 | to | -1.20  | (-1.58 | to     | -1.27 | (-1.68 | to | -0.36 | (-0.39 | to | -1.17 | (-1.53 | to |
|                                 | -0.01) |        | -0.01) |       | -0.82) |    | -0.87) |        | -0.33) |       | -0.81) |    |       |        |    |       |        |    |
| Russian Federation              | 0.04   | (0.00  | to     | -0.06 | (-0.16 | to | 1.85   | (1.27  | to     | 2.15  | (1.38  | to | -0.13 | (-0.20 | to | 1.75  | (1.12  | to |
|                                 | 0.09)  |        | 0.05)  |       | 2.43)  |    | 2.92)  |        | -0.06) |       | 2.38)  |    |       |        |    |       |        |    |
| Ukraine                         | 0.04   | (0.04  | to     | 0.04  | (0.01  | to | 2.07   | (1.53  | to     | 2.79  | (2.10  | to | 0.02  | (-0.01 | to | 2.30  | (1.73  | to |
|                                 | 0.05)  |        | 0.06)  |       | 2.63)  |    | 3.49)  |        | 0.06)  |       | 2.88)  |    |       |        |    |       |        |    |
| <b>High income</b>              | 0.07   | (0.05  | to     | -0.08 | (-0.12 | to | -1.30  | (-1.35 | to     | -1.51 | (-1.58 | to | -0.37 | (-0.43 | to | -1.20 | (-1.27 | to |
|                                 | 0.09)  |        | -0.04) |       | -1.24) |    | -1.45) |        | -0.30) |       | -1.13) |    |       |        |    |       |        |    |
| <b>Australasia</b>              | 0.14   | (0.12  | to     | 0.05  | (-0.02 | to | -1.12  | (-1.28 | to     | -1.23 | (-1.41 | to | 0.02  | (-0.03 | to | -0.79 | (-0.93 | to |
|                                 | 0.16)  |        | 0.11)  |       | -0.95) |    | -1.05) |        | 0.07)  |       | -0.66) |    |       |        |    |       |        |    |
| Australia                       | 0.12   | (0.08  | to     | 0.02  | (-0.07 | to | -1.06  | (-1.22 | to     | -1.16 | (-1.34 | to | -0.01 | (-0.08 | to | -0.78 | (-0.92 | to |
|                                 | 0.15)  |        | 0.11)  |       | -0.89) |    | -0.98) |        | 0.06)  |       | -0.63) |    |       |        |    |       |        |    |
| New Zealand                     | 0.25   | (0.22  | to     | 0.20  | (0.18  | to | -1.48  | (-1.64 | to     | -1.68 | (-1.84 | to | 0.20  | (0.16  | to | -0.86 | (-0.95 | to |
|                                 | 0.28)  |        | 0.22)  |       | -1.31) |    | -1.52) |        | 0.24)  |       | -0.78) |    |       |        |    |       |        |    |
| <b>High-income Asia Pacific</b> | -0.07  | (-0.13 | to     | 0.27  | (0.18  | to | -2.74  | (-2.91 | to     | -3.31 | (-3.45 | to | -0.09 | (-0.14 | to | -2.28 | (-2.42 | to |
|                                 | 0.00)  |        | 0.36)  |       | -2.57) |    | -3.17) |        | -0.04) |       | -2.15) |    |       |        |    |       |        |    |
| Brunei Darussalam               | -0.34  | (-0.36 | to     | 0.00  | (-0.01 | to | -1.85  | (-2.09 | to     | -2.18 | (-2.46 | to | -0.44 | (-0.49 | to | -1.73 | (-1.96 | to |
|                                 | -0.32) |        | 0.00)  |       | -1.62) |    | -1.89) |        | -0.38) |       | -1.50) |    |       |        |    |       |        |    |
| Japan                           | -0.02  | (-0.05 | to     | 0.31  | (0.22  | to | -2.00  | (-2.16 | to     | -2.29 | (-2.39 | to | 0.14  | (0.11  | to | -1.37 | (-1.46 | to |

|                               |        |        |        |       |        |    |        |        |        |       |        |    |       |        |    |       |        |    |
|-------------------------------|--------|--------|--------|-------|--------|----|--------|--------|--------|-------|--------|----|-------|--------|----|-------|--------|----|
|                               | 0.01)  |        | 0.39)  |       | -1.84) |    | -2.19) |        | 0.18)  |       | -1.29) |    |       |        |    |       |        |    |
| Republic of Korea             | -0.28  | (-0.45 | to     | 0.15  | (0.02  | to | -5.08  | (-5.44 | to     | -5.65 | (-5.97 | to | -0.77 | (-0.93 | to | -4.62 | (-4.94 | to |
|                               | -0.10) |        | 0.29)  |       | -4.72) |    | -5.32) |        | -0.62) |       | -4.30) |    |       |        |    |       |        |    |
| Singapore                     | -0.15  | (-0.16 | to     | 0.09  | (0.08  | to | -3.12  | (-3.28 | to     | -3.72 | (-3.90 | to | -0.37 | (-0.40 | to | -2.21 | (-2.36 | to |
|                               | -0.14) |        | 0.10)  |       | -2.96) |    | -3.54) |        | -0.35) |       | -2.07) |    |       |        |    |       |        |    |
| <b>High-income</b>            | -0.02  | (-0.08 | to     | -0.53 | (-0.64 | to | -0.17  | (-0.21 | to     | -0.09 | (-0.14 | to | -0.67 | (-0.83 | to | -0.25 | (-0.32 | to |
| <b>North America</b>          | 0.05)  |        | -0.41) |       | -0.13) |    | -0.04) |        | -0.51) |       | -0.17) |    |       |        |    |       |        |    |
| Canada                        | 0.07   | (0.07  | to     | 0.06  | (0.05  | to | -0.97  | (-1.02 | to     | -0.89 | (-0.96 | to | -0.07 | (-0.12 | to | -0.62 | (-0.68 | to |
|                               | 0.08)  |        | 0.08)  |       | -0.91) |    | -0.81) |        | -0.02) |       | -0.55) |    |       |        |    |       |        |    |
| Greenland                     | 0.01   | (0.01  | to     | -0.03 | (-0.04 | to | -1.48  | (-1.64 | to     | -1.63 | (-1.73 | to | -0.29 | (-0.31 | to | -1.42 | (-1.51 | to |
|                               | 0.02)  |        | -0.02) |       | -1.33) |    | -1.52) |        | -0.26) |       | -1.32) |    |       |        |    |       |        |    |
| United States of America      | -0.02  | (-0.09 | to     | -0.58 | (-0.70 | to | -0.10  | (-0.14 | to     | -0.02 | (-0.08 | to | -0.74 | (-0.91 | to | -0.21 | (-0.29 | to |
|                               | 0.05)  |        | -0.45) |       | -0.05) |    | 0.03)  |        | -0.57) |       | -0.14) |    |       |        |    |       |        |    |
| <b>Southern Latin America</b> | 0.12   | (0.07  | to     | -0.04 | (-0.09 | to | -0.82  | (-0.94 | to     | -1.10 | (-1.26 | to | -0.27 | (-0.36 | to | -0.95 | (-1.08 | to |
|                               | 0.17)  |        | 0.01)  |       | -0.69) |    | -0.94) |        | -0.19) |       | -0.82) |    |       |        |    |       |        |    |
| Argentina                     | 0.07   | (0.01  | to     | -0.08 | (-0.15 | to | -0.47  | (-0.64 | to     | -0.70 | (-0.90 | to | -0.29 | (-0.40 | to | -0.63 | (-0.79 | to |
|                               | 0.14)  |        | -0.02) |       | -0.31) |    | -0.50) |        | -0.18) |       | -0.46) |    |       |        |    |       |        |    |
| Chile                         | 0.19   | (0.15  | to     | 0.03  | (0.00  | to | -1.71  | (-1.82 | to     | -2.07 | (-2.22 | to | -0.32 | (-0.40 | to | -1.80 | (-1.93 | to |
|                               | 0.22)  |        | 0.06)  |       | -1.60) |    | -1.91) |        | -0.25) |       | -1.66) |    |       |        |    |       |        |    |
| Uruguay                       | 0.25   | (0.22  | to     | 0.08  | (0.07  | to | -1.04  | (-1.10 | to     | -1.41 | (-1.47 | to | -0.05 | (-0.06 | to | -1.11 | (-1.17 | to |
|                               | 0.27)  |        | 0.08)  |       | -0.99) |    | -1.34) |        | -0.04) |       | -1.05) |    |       |        |    |       |        |    |
| <b>Western Europe</b>         | 0.18   | (0.15  | to     | 0.10  | (0.07  | to | -1.55  | (-1.61 | to     | -1.95 | (-2.03 | to | -0.22 | (-0.28 | to | -1.48 | (-1.55 | to |
|                               | 0.21)  |        | 0.13)  |       | -1.50) |    | -1.88) |        | -0.15) |       | -1.42) |    |       |        |    |       |        |    |
| Andorra                       | 0.23   | (0.19  | to     | 0.06  | (0.05  | to | -0.71  | (-0.82 | to     | -0.84 | (-0.90 | to | -0.03 | (-0.05 | to | -0.62 | (-0.68 | to |
|                               | 0.27)  |        | 0.07)  |       | -0.61) |    | -0.77) |        | -0.02) |       | -0.57) |    |       |        |    |       |        |    |
| Austria                       | 0.06   | (0.02  | to     | -0.05 | (-0.11 | to | -2.39  | (-2.48 | to     | -2.80 | (-2.88 | to | -0.27 | (-0.38 | to | -2.06 | (-2.12 | to |
|                               | 0.10)  |        | 0.00)  |       | -2.30) |    | -2.72) |        | -0.16) |       | -2.00) |    |       |        |    |       |        |    |
| Belgium                       | 0.32   | (0.24  | to     | 0.19  | (0.10  | to | -1.03  | (-1.21 | to     | -1.15 | (-1.31 | to | 0.34  | (0.17  | to | -0.78 | (-0.93 | to |
|                               | 0.39)  |        | 0.28)  |       | -0.85) |    | -0.98) |        | 0.51)  |       | -0.63) |    |       |        |    |       |        |    |
| Cyprus                        | 0.22   | (0.15  | to     | 0.14  | (0.08  | to | -2.32  | (-2.45 | to     | -2.49 | (-2.61 | to | 0.14  | (-0.03 | to | -1.89 | (-1.97 | to |
|                               | 0.29)  |        | 0.20)  |       | -2.18) |    | -2.37) |        | 0.31)  |       | -1.81) |    |       |        |    |       |        |    |
| Denmark                       | 0.12   | (0.08  | to     | -0.07 | (-0.10 | to | -1.27  | (-1.76 | to     | -1.87 | (-2.34 | to | -0.31 | (-0.35 | to | -1.49 | (-1.86 | to |
|                               | 0.15)  |        | -0.05) |       | -0.79) |    | -1.40) |        | -0.26) |       | -1.13) |    |       |        |    |       |        |    |
| Finland                       | 0.16   | (0.08  | to     | -0.07 | (-0.14 | to | -0.32  | (-0.57 | to     | 0.06  | (-0.29 | to | 0.06  | (-0.06 | to | 0.06  | (-0.22 | to |
|                               | 0.24)  |        | 0.00)  |       | -0.07) |    | 0.40)  |        | 0.19)  |       | 0.34)  |    |       |        |    |       |        |    |
| France                        | 0.13   | (0.06  | to     | -0.02 | (-0.17 | to | -2.23  | (-2.30 | to     | -2.45 | (-2.53 | to | -0.24 | (-0.37 | to | -1.98 | (-2.04 | to |
|                               | 0.20)  |        | 0.13)  |       | -2.15) |    | -2.37) |        | -0.11) |       | -1.92) |    |       |        |    |       |        |    |
| Germany                       | 0.27   | (0.20  | to     | 0.12  | (0.01  | to | -1.39  | (-1.48 | to     | -2.04 | (-2.19 | to | 0.03  | (-0.17 | to | -1.59 | (-1.71 | to |
|                               | 0.34)  |        | 0.24)  |       | -1.29) |    | -1.90) |        | 0.23)  |       | -1.48) |    |       |        |    |       |        |    |
| Greece                        | 0.13   | (0.09  | to     | 0.06  | (0.06  | to | -1.09  | (-1.26 | to     | -0.96 | (-1.14 | to | -0.04 | (-0.06 | to | -0.65 | (-0.78 | to |
|                               | 0.16)  |        | 0.07)  |       | -0.92) |    | -0.77) |        | -0.03) |       | -0.52) |    |       |        |    |       |        |    |
| Iceland                       | 0.44   | (0.40  | to     | 0.19  | (0.14  | to | -1.74  | (-1.83 | to     | -1.94 | (-2.02 | to | 0.31  | (0.24  | to | -1.19 | (-1.24 | to |
|                               | 0.49)  |        | 0.23)  |       | -1.64) |    | -1.85) |        | 0.38)  |       | -1.13) |    |       |        |    |       |        |    |
| Ireland                       | 0.33   | (0.29  | to     | 0.08  | (0.08  | to | -1.27  | (-1.52 | to     | -1.05 | (-1.36 | to | -0.06 | (-0.08 | to | -0.76 | (-0.99 | to |

|                                    |       |        |        |       |        |    |        |        |        |       |        |    |       |        |    |       |        |    |
|------------------------------------|-------|--------|--------|-------|--------|----|--------|--------|--------|-------|--------|----|-------|--------|----|-------|--------|----|
|                                    | 0.36) |        | 0.09)  |       | -1.03) |    | -0.73) |        | -0.03) |       | -0.52) |    |       |        |    |       |        |    |
| Israel                             | 0.42  | (0.39  | to     | 0.05  | (0.03  | to | -1.14  | (-1.39 | to     | -1.49 | (-1.73 | to | -0.11 | (-0.14 | to | -1.07 | (-1.24 | to |
|                                    | 0.46) |        | 0.07)  |       | -0.88) |    | -1.25) |        | -0.08) |       | -0.90) |    |       |        |    |       |        |    |
| Italy                              | 0.06  | (0.04  | to     | 0.14  | (0.08  | to | -2.45  | (-2.58 | to     | -3.03 | (-3.19 | to | -0.49 | (-0.63 | to | -2.08 | (-2.25 | to |
|                                    | 0.09) |        | 0.19)  |       | -2.33) |    | -2.88) |        | -0.34) |       | -1.91) |    |       |        |    |       |        |    |
| Luxembourg                         | 0.13  | (0.05  | to     | -0.01 | (-0.13 | to | -2.16  | (-2.27 | to     | -2.57 | (-2.67 | to | -0.16 | (-0.37 | to | -1.98 | (-2.08 | to |
|                                    | 0.22) |        | 0.11)  |       | -2.04) |    | -2.48) |        | 0.05)  |       | -1.88) |    |       |        |    |       |        |    |
| Malta                              | 0.36  | (0.28  | to     | 0.15  | (0.11  | to | -1.82  | (-1.92 | to     | -1.79 | (-1.87 | to | 0.20  | (0.08  | to | -1.21 | (-1.29 | to |
|                                    | 0.44) |        | 0.19)  |       | -1.71) |    | -1.71) |        | 0.33)  |       | -1.14) |    |       |        |    |       |        |    |
| Netherlands                        | 0.25  | (0.23  | to     | 0.05  | (0.04  | to | -1.47  | (-1.76 | to     | -1.80 | (-2.11 | to | -0.38 | (-0.45 | to | -1.42 | (-1.66 | to |
|                                    | 0.26) |        | 0.05)  |       | -1.19) |    | -1.49) |        | -0.31) |       | -1.18) |    |       |        |    |       |        |    |
| Norway                             | 0.21  | (0.19  | to     | 0.40  | (0.29  | to | -1.47  | (-1.56 | to     | -1.88 | (-1.99 | to | -0.02 | (-0.05 | to | -1.01 | (-1.06 | to |
|                                    | 0.24) |        | 0.52)  |       | -1.37) |    | -1.77) |        | 0.01)  |       | -0.96) |    |       |        |    |       |        |    |
| Portugal                           | 0.23  | (0.18  | to     | 0.16  | (0.14  | to | -2.57  | (-2.69 | to     | -3.22 | (-3.33 | to | 0.17  | (0.12  | to | -2.67 | (-2.78 | to |
|                                    | 0.27) |        | 0.17)  |       | -2.45) |    | -3.11) |        | 0.22)  |       | -2.56) |    |       |        |    |       |        |    |
| Monaco                             | 0.26  | (0.23  | to     | 0.06  | (0.06  | to | -0.08  | (-0.20 | to     | -0.26 | (-0.35 | to | 0.01  | (-0.01 | to | -0.19 | (-0.25 | to |
|                                    | 0.29) |        | 0.06)  |       | 0.04)  |    | -0.18) |        | 0.02)  |       | -0.13) |    |       |        |    |       |        |    |
| San Marino                         | 0.25  | (0.22  | to     | 0.07  | (0.07  | to | -0.37  | (-0.48 | to     | -0.53 | (-0.65 | to | 0.02  | (0.00  | to | -0.38 | (-0.47 | to |
|                                    | 0.28) |        | 0.07)  |       | -0.26) |    | -0.41) |        | 0.04)  |       | -0.29) |    |       |        |    |       |        |    |
| Spain                              | 0.14  | (0.11  | to     | 0.05  | (-0.06 | to | -2.26  | (-2.35 | to     | -2.89 | (-3.00 | to | -0.19 | (-0.28 | to | -2.33 | (-2.43 | to |
|                                    | 0.18) |        | 0.15)  |       | -2.16) |    | -2.78) |        | -0.09) |       | -2.23) |    |       |        |    |       |        |    |
| Sweden                             | 0.35  | (0.29  | to     | 0.10  | (0.01  | to | -1.01  | (-1.08 | to     | -1.23 | (-1.33 | to | -0.01 | (-0.09 | to | -0.79 | (-0.85 | to |
|                                    | 0.42) |        | 0.19)  |       | -0.94) |    | -1.14) |        | 0.08)  |       | -0.73) |    |       |        |    |       |        |    |
| Switzerland                        | 0.33  | (0.25  | to     | 0.15  | (0.01  | to | -0.73  | (-1.02 | to     | -1.47 | (-1.69 | to | -0.01 | (-0.29 | to | -1.05 | (-1.27 | to |
|                                    | 0.42) |        | 0.28)  |       | -0.45) |    | -1.26) |        | 0.28)  |       | -0.83) |    |       |        |    |       |        |    |
| United Kingdom                     | 0.22  | (0.11  | to     | 0.25  | (0.13  | to | 0.34   | (0.13  | to     | 0.48  | (0.19  | to | -0.16 | (-0.41 | to | 0.26  | (0.05  | to |
|                                    | 0.34) |        | 0.37)  |       | 0.54)  |    | 0.77)  |        | 0.10)  |       | 0.46)  |    |       |        |    |       |        |    |
| <b>Latin America and Caribbean</b> | -0.01 | (-0.02 | to     | 0.02  | (-0.02 | to | -1.15  | (-1.24 | to     | -1.56 | (-1.69 | to | -0.36 | (-0.38 | to | -1.32 | (-1.42 | to |
|                                    | 0.00) |        | 0.06)  |       | -1.06) |    | -1.44) |        | -0.33) |       | -1.22) |    |       |        |    |       |        |    |
| <b>Andean Latin America</b>        | 0.05  | (0.04  | to     | -0.21 | (-0.27 | to | -1.59  | (-1.70 | to     | -2.80 | (-3.04 | to | -0.62 | (-0.68 | to | -2.45 | (-2.66 | to |
|                                    | 0.06) |        | -0.16) |       | -1.47) |    | -2.55) |        | -0.56) |       | -2.23) |    |       |        |    |       |        |    |
| Ecuador                            | 0.09  | (0.07  | to     | 0.07  | (0.05  | to | -0.40  | (-0.64 | to     | -1.31 | (-1.54 | to | -0.24 | (-0.27 | to | -1.13 | (-1.32 | to |
|                                    | 0.12) |        | 0.08)  |       | -0.16) |    | -1.08) |        | -0.21) |       | -0.94) |    |       |        |    |       |        |    |
| Peru                               | 0.01  | (-0.01 | to     | -0.38 | (-0.47 | to | -2.37  | (-2.57 | to     | -3.82 | (-4.21 | to | -0.82 | (-0.91 | to | -3.31 | (-3.65 | to |
|                                    | 0.02) |        | -0.29) |       | -2.16) |    | -3.43) |        | -0.73) |       | -2.96) |    |       |        |    |       |        |    |
| Bolivia (Plurinational State of)   | 0.02  | (0.02  | to     | -0.03 | (-0.05 | to | -1.02  | (-1.08 | to     | -1.91 | (-2.01 | to | -0.51 | (-0.54 | to | -1.73 | (-1.83 | to |
|                                    | 0.03) |        | -0.01) |       | -0.95) |    | -1.82) |        | -0.48) |       | -1.64) |    |       |        |    |       |        |    |
| <b>Caribbean</b>                   | 0.10  | (0.10  | to     | 0.07  | (0.07  | to | -1.08  | (-1.29 | to     | -1.21 | (-1.47 | to | -0.05 | (-0.06 | to | -0.98 | (-1.19 | to |
|                                    | 0.11) |        | 0.08)  |       | -0.86) |    | -0.95) |        | -0.03) |       | -0.76) |    |       |        |    |       |        |    |
| Antigua and Barbuda                | 0.09  | (0.09  | to     | 0.10  | (0.09  | to | -0.94  | (-1.19 | to     | -1.26 | (-1.48 | to | 0.02  | (0.00  | to | -0.91 | (-1.08 | to |
|                                    | 0.10) |        | 0.10)  |       | -0.69) |    | -1.03) |        | 0.04)  |       | -0.74) |    |       |        |    |       |        |    |
| Barbados                           | 0.09  | (0.09  | to     | 0.09  | (0.08  | to | -0.94  | (-1.05 | to     | -1.27 | (-1.41 | to | -0.02 | (-0.04 | to | -0.92 | (-1.02 | to |
|                                    | 0.10) |        | 0.09)  |       | -0.82) |    | -1.13) |        | 0.00)  |       | -0.81) |    |       |        |    |       |        |    |

|                                    |       |        |    |       |        |    |       |        |    |       |        |    |       |        |    |       |        |    |        |       |        |        |        |        |
|------------------------------------|-------|--------|----|-------|--------|----|-------|--------|----|-------|--------|----|-------|--------|----|-------|--------|----|--------|-------|--------|--------|--------|--------|
| Belize                             | 0.16  | (0.11  | to | 0.09  | (0.09  | to | -0.22 | (-0.56 | to | -0.29 | (-0.59 | to | 0.03  | (0.01  | to | -0.23 | (-0.46 | to | 0.21)  | 0.10) | 0.13)  | 0.00)  | 0.05)  | 0.01)  |
| Bermuda                            | 0.09  | (0.08  | to | 0.14  | (0.13  | to | -2.84 | (-3.09 | to | -2.98 | (-3.27 | to | -0.03 | (-0.06 | to | -1.97 | (-2.19 | to | 0.09)  | 0.14) | -2.58) | -2.69) | -0.01) | -1.74) |
| Bahamas                            | 0.07  | (0.06  | to | 0.06  | (0.05  | to | -1.25 | (-1.40 | to | -1.38 | (-1.56 | to | -0.12 | (-0.14 | to | -1.11 | (-1.26 | to | 0.08)  | 0.06) | -1.09) | -1.20) | -0.11) | -0.96) |
| Cuba                               | 0.15  | (0.14  | to | 0.08  | (0.07  | to | -0.62 | (-0.88 | to | -0.54 | (-0.80 | to | -0.02 | (-0.05 | to | -0.38 | (-0.56 | to | 0.15)  | 0.09) | -0.37) | -0.29) | 0.01)  | -0.21) |
| Dominica                           | 0.07  | (0.06  | to | 0.02  | (0.02  | to | -0.92 | (-1.01 | to | -1.03 | (-1.11 | to | -0.06 | (-0.09 | to | -0.80 | (-0.87 | to | 0.09)  | 0.03) | -0.83) | -0.94) | -0.04) | -0.73) |
| Dominican Republic                 | 0.17  | (0.16  | to | 0.10  | (0.08  | to | -0.97 | (-1.38 | to | -1.49 | (-2.00 | to | -0.06 | (-0.10 | to | -1.24 | (-1.66 | to | 0.18)  | 0.11) | -0.56) | -0.98) | -0.02) | -0.82) |
| Grenada                            | 0.10  | (0.09  | to | 0.07  | (0.06  | to | -0.98 | (-1.15 | to | -1.20 | (-1.39 | to | -0.05 | (-0.09 | to | -0.96 | (-1.12 | to | 0.10)  | 0.08) | -0.81) | -1.01) | -0.01) | -0.80) |
| Guyana                             | 0.09  | (0.08  | to | 0.05  | (0.04  | to | -0.84 | (-1.06 | to | -0.81 | (-1.00 | to | -0.18 | (-0.22 | to | -0.73 | (-0.90 | to | 0.09)  | 0.06) | -0.61) | -0.62) | -0.15) | -0.56) |
| Haiti                              | -0.06 | (-0.07 | to | 0.09  | (0.09  | to | -1.26 | (-1.37 | to | -1.47 | (-1.63 | to | -0.19 | (-0.20 | to | -1.30 | (-1.44 | to | -0.05) | 0.10) | -1.14) | -1.31) | -0.18) | -1.15) |
| Jamaica                            | 0.20  | (0.18  | to | 0.09  | (0.08  | to | -0.85 | (-1.16 | to | -1.32 | (-1.69 | to | 0.07  | (0.04  | to | -0.86 | (-1.10 | to | 0.22)  | 0.09) | -0.53) | -0.95) | 0.09)  | -0.61) |
| Puerto Rico                        | 0.16  | (0.14  | to | 0.10  | (0.10  | to | -2.78 | (-3.06 | to | -3.11 | (-3.42 | to | -0.11 | (-0.14 | to | -2.42 | (-2.67 | to | 0.18)  | 0.11) | -2.50) | -2.80) | -0.08) | -2.17) |
| Saint Kitts and Nevis              | 0.02  | (0.01  | to | 0.03  | (0.03  | to | -1.88 | (-2.16 | to | -2.31 | (-2.64 | to | -0.29 | (-0.35 | to | -1.93 | (-2.21 | to | 0.03)  | 0.04) | -1.60) | -1.99) | -0.23) | -1.66) |
| Saint Lucia                        | 0.11  | (0.10  | to | 0.09  | (0.08  | to | -1.98 | (-2.34 | to | -1.99 | (-2.33 | to | -0.06 | (-0.10 | to | -1.55 | (-1.83 | to | 0.11)  | 0.09) | -1.62) | -1.65) | -0.03) | -1.28) |
| Saint Vincent and the Grenadines   | 0.15  | (0.14  | to | 0.05  | (0.05  | to | -0.82 | (-1.12 | to | -1.00 | (-1.27 | to | -0.05 | (-0.07 | to | -0.79 | (-0.99 | to | 0.16)  | 0.06) | -0.52) | -0.74) | -0.04) | -0.58) |
| Suriname                           | 0.12  | (0.11  | to | 0.07  | (0.06  | to | -0.98 | (-1.18 | to | -1.32 | (-1.48 | to | -0.17 | (-0.18 | to | -1.12 | (-1.25 | to | 0.12)  | 0.08) | -0.79) | -1.15) | -0.15) | -0.98) |
| Trinidad and Tobago                | 0.11  | (0.10  | to | 0.03  | (0.02  | to | -1.70 | (-1.91 | to | -1.76 | (-1.97 | to | -0.23 | (-0.27 | to | -1.38 | (-1.53 | to | 0.11)  | 0.05) | -1.49) | -1.56) | -0.19) | -1.22) |
| United States Virgin Islands       | 0.17  | (0.15  | to | 0.10  | (0.09  | to | -0.32 | (-0.51 | to | -0.63 | (-0.79 | to | 0.00  | (-0.01 | to | -0.49 | (-0.61 | to | 0.19)  | 0.11) | -0.12) | -0.47) | 0.02)  | -0.36) |
| <b>Central Latin America</b>       | 0.06  | (0.05  | to | 0.09  | (0.07  | to | -1.17 | (-1.28 | to | -1.44 | (-1.59 | to | -0.31 | (-0.38 | to | -1.22 | (-1.36 | to | 0.07)  | 0.11) | -1.05) | -1.28) | -0.25) | -1.09) |
| Venezuela (Bolivarian Republic of) | 0.04  | (0.03  | to | 0.01  | (0.00  | to | -1.09 | (-1.27 | to | -1.29 | (-1.50 | to | -0.35 | (-0.39 | to | -1.04 | (-1.20 | to | 0.05)  | 0.01) | -0.91) | -1.09) | -0.30) | -0.88) |
| Colombia                           | -0.10 | (-0.12 | to | 0.09  | (0.09  | to | -1.68 | (-1.83 | to | -1.96 | (-2.09 | to | -0.32 | (-0.35 | to | -1.41 | (-1.51 | to | -0.09) | 0.10) | -1.53) | -1.82) | -0.28) | -1.32) |
| Costa Rica                         | 0.01  | (0.00  | to | 0.04  | (0.02  | to | -0.56 | (-0.83 | to | -0.73 | (-0.99 | to | -0.17 | (-0.21 | to | -0.58 | (-0.77 | to | 0.02)  | 0.05) | -0.29) | -0.47) | -0.13) | -0.39) |
| El Salvador                        | 0.01  | (0.00  | to | -0.09 | (-0.13 | to | -1.83 | (-2.13 | to | -2.28 | (-2.65 | to | -0.61 | (-0.70 | to | -1.96 | (-2.28 | to | 0.01)  | 0.00) | -0.09) | -1.83) | -2.28) | -2.65) |

|                                     |        |        |        |       |        |    |        |        |        |       |        |    |       |        |    |       |        |    |
|-------------------------------------|--------|--------|--------|-------|--------|----|--------|--------|--------|-------|--------|----|-------|--------|----|-------|--------|----|
|                                     | 0.01)  |        | -0.05) |       | -1.52) |    | -1.91) |        | -0.51) |       | -1.64) |    |       |        |    |       |        |    |
| Guatemala                           | -0.08  | (-0.09 | to     | -0.10 | (-0.15 | to | -1.44  | (-1.61 | to     | -1.87 | (-2.08 | to | -0.72 | (-0.79 | to | -1.73 | (-1.92 | to |
|                                     | -0.06) |        | -0.04) |       | -1.27) |    | -1.67) |        | -0.65) |       | -1.55) |    |       |        |    |       |        |    |
| Honduras                            | -0.03  | (-0.04 | to     | 0.02  | (0.01  | to | 0.14   | (-0.02 | to     | -1.09 | (-1.16 | to | -0.44 | (-0.47 | to | -1.01 | (-1.08 | to |
|                                     | -0.02) |        | 0.04)  |       | 0.29)  |    | -1.01) |        | -0.41) |       | -0.93) |    |       |        |    |       |        |    |
| Mexico                              | 0.13   | (0.11  | to     | 0.14  | (0.11  | to | -1.14  | (-1.29 | to     | -1.37 | (-1.54 | to | -0.25 | (-0.34 | to | -1.19 | (-1.33 | to |
|                                     | 0.16)  |        | 0.18)  |       | -0.99) |    | -1.21) |        | -0.16) |       | -1.04) |    |       |        |    |       |        |    |
| Nicaragua                           | -0.08  | (-0.10 | to     | 0.08  | (0.06  | to | 0.25   | (0.08  | to     | -0.17 | (-0.30 | to | -0.35 | (-0.40 | to | -0.21 | (-0.31 | to |
|                                     | -0.06) |        | 0.09)  |       | 0.42)  |    | -0.04) |        | -0.30) |       | -0.10) |    |       |        |    |       |        |    |
| Panama                              | 0.09   | (0.08  | to     | -0.03 | (-0.05 | to | -0.75  | (-0.90 | to     | -0.90 | (-1.14 | to | -0.31 | (-0.36 | to | -0.71 | (-0.89 | to |
|                                     | 0.11)  |        | -0.01) |       | -0.60) |    | -0.65) |        | -0.26) |       | -0.54) |    |       |        |    |       |        |    |
| <b>Tropical Latin America</b>       | -0.12  | (-0.15 | to     | -0.03 | (-0.09 | to | -1.08  | (-1.14 | to     | -1.41 | (-1.46 | to | -0.46 | (-0.53 | to | -1.20 | (-1.23 | to |
|                                     | -0.09) |        | 0.04)  |       | -1.02) |    | -1.37) |        | -0.39) |       | -1.17) |    |       |        |    |       |        |    |
| Brazil                              | -0.12  | (-0.15 | to     | -0.02 | (-0.09 | to | -1.10  | (-1.16 | to     | -1.44 | (-1.48 | to | -0.46 | (-0.54 | to | -1.22 | (-1.24 | to |
|                                     | -0.09) |        | 0.04)  |       | -1.05) |    | -1.40) |        | -0.39) |       | -1.19) |    |       |        |    |       |        |    |
| Paraguay                            | -0.06  | (-0.06 | to     | -0.10 | (-0.12 | to | 0.29   | (0.21  | to     | -0.08 | (-0.22 | to | -0.40 | (-0.46 | to | -0.17 | (-0.28 | to |
|                                     | -0.05) |        | -0.08) |       | 0.38)  |    | 0.07)  |        | -0.34) |       | -0.06) |    |       |        |    |       |        |    |
| <b>North Africa and Middle East</b> | 0.05   | (0.04  | to     | 0.15  | (0.14  | to | -1.50  | (-1.57 | to     | -1.62 | (-1.67 | to | -0.01 | (-0.03 | to | -1.37 | (-1.42 | to |
|                                     | 0.06)  |        | 0.15)  |       | -1.42) |    | -1.56) |        | 0.01)  |       | -1.32) |    |       |        |    |       |        |    |
| Afghanistan                         | -0.09  | (-0.10 | to     | 0.06  | (0.05  | to | -1.18  | (-1.35 | to     | -1.40 | (-1.61 | to | -0.09 | (-0.12 | to | -1.26 | (-1.44 | to |
|                                     | -0.07) |        | 0.07)  |       | -1.01) |    | -1.20) |        | -0.05) |       | -1.07) |    |       |        |    |       |        |    |
| Algeria                             | 0.15   | (0.13  | to     | 0.08  | (0.08  | to | -1.86  | (-1.93 | to     | -2.14 | (-2.20 | to | -0.10 | (-0.12 | to | -1.69 | (-1.75 | to |
|                                     | 0.18)  |        | 0.09)  |       | -1.80) |    | -2.08) |        | -0.08) |       | -1.64) |    |       |        |    |       |        |    |
| Bahrain                             | 0.10   | (0.08  | to     | 0.06  | (0.05  | to | -2.71  | (-3.02 | to     | -3.15 | (-3.44 | to | -0.29 | (-0.33 | to | -2.69 | (-2.93 | to |
|                                     | 0.13)  |        | 0.07)  |       | -2.40) |    | -2.86) |        | -0.26) |       | -2.45) |    |       |        |    |       |        |    |
| Egypt                               | -0.06  | (-0.09 | to     | 0.10  | (0.09  | to | -0.78  | (-0.92 | to     | -0.90 | (-1.03 | to | -0.14 | (-0.18 | to | -0.86 | (-0.97 | to |
|                                     | -0.03) |        | 0.11)  |       | -0.65) |    | -0.78) |        | -0.11) |       | -0.74) |    |       |        |    |       |        |    |
| Iraq                                | 0.03   | (-0.02 | to     | 0.12  | (0.11  | to | -1.62  | (-1.75 | to     | -2.05 | (-2.17 | to | -0.03 | (-0.05 | to | -1.57 | (-1.66 | to |
|                                     | 0.08)  |        | 0.14)  |       | -1.50) |    | -1.92) |        | 0.00)  |       | -1.48) |    |       |        |    |       |        |    |
| Iran (Islamic Republic of)          | 0.16   | (0.07  | to     | 0.12  | (0.09  | to | -1.53  | (-1.69 | to     | -1.74 | (-1.89 | to | -0.05 | (-0.10 | to | -1.28 | (-1.39 | to |
|                                     | 0.24)  |        | 0.15)  |       | -1.36) |    | -1.59) |        | 0.01)  |       | -1.17) |    |       |        |    |       |        |    |
| Jordan                              | -0.11  | (-0.13 | to     | 0.13  | (0.13  | to | -2.65  | (-2.89 | to     | -2.85 | (-3.12 | to | 0.11  | (0.08  | to | -2.14 | (-2.34 | to |
|                                     | -0.08) |        | 0.14)  |       | -2.41) |    | -2.57) |        | 0.13)  |       | -1.95) |    |       |        |    |       |        |    |
| Kuwait                              | 0.22   | (0.20  | to     | 0.16  | (0.14  | to | -0.19  | (-0.64 | to     | -0.68 | (-1.17 | to | 0.06  | (0.03  | to | -0.42 | (-0.75 | to |
|                                     | 0.24)  |        | 0.18)  |       | 0.27)  |    | -0.18) |        | 0.09)  |       | -0.09) |    |       |        |    |       |        |    |
| Lebanon                             | 0.11   | (0.08  | to     | 0.20  | (0.19  | to | -1.35  | (-1.44 | to     | -1.46 | (-1.60 | to | 0.07  | (0.05  | to | -1.06 | (-1.17 | to |
|                                     | 0.13)  |        | 0.20)  |       | -1.25) |    | -1.33) |        | 0.09)  |       | -0.96) |    |       |        |    |       |        |    |
| Libya                               | 0.09   | (0.07  | to     | 0.12  | (0.11  | to | -1.40  | (-1.53 | to     | -1.60 | (-1.73 | to | -0.05 | (-0.07 | to | -1.28 | (-1.38 | to |
|                                     | 0.10)  |        | 0.12)  |       | -1.27) |    | -1.47) |        | -0.02) |       | -1.17) |    |       |        |    |       |        |    |
| Morocco                             | 0.14   | (0.11  | to     | 0.08  | (0.07  | to | -1.13  | (-1.30 | to     | -1.44 | (-1.52 | to | -0.14 | (-0.17 | to | -1.19 | (-1.26 | to |
|                                     | 0.18)  |        | 0.09)  |       | -0.96) |    | -1.36) |        | -0.12) |       | -1.12) |    |       |        |    |       |        |    |
| Palestine                           | -0.07  | (-0.11 | to     | 0.07  | (0.05  | to | -1.17  | (-1.30 | to     | -1.41 | (-1.56 | to | -0.04 | (-0.08 | to | -1.12 | (-1.25 | to |
|                                     | -0.04) |        | 0.09)  |       | -1.03) |    | -1.27) |        | 0.01)  |       | -0.99) |    |       |        |    |       |        |    |
| Oman                                | 0.22   | (0.18  | to     | 0.07  | (0.05  | to | -0.73  | (-0.98 | to     | -1.19 | (-1.44 | to | -0.18 | (-0.20 | to | -0.97 | (-1.17 | to |

|                                               |        |        |        |       |        |    |        |        |        |       |        |    |       |        |    |       |        |    |
|-----------------------------------------------|--------|--------|--------|-------|--------|----|--------|--------|--------|-------|--------|----|-------|--------|----|-------|--------|----|
|                                               | 0.26)  |        | 0.09)  |       | -0.49) |    | -0.93) |        | -0.15) |       | -0.78) |    |       |        |    |       |        |    |
| Qatar                                         | 0.18   | (0.16  | to     | 0.15  | (0.14  | to | -0.03  | (-0.27 | to     | -1.01 | (-1.20 | to | 0.00  | (-0.02 | to | -0.85 | (-1.01 | to |
|                                               | 0.20)  |        | 0.16)  |       | 0.22)  |    | -0.81) |        | 0.01)  |       | -0.68) |    |       |        |    |       |        |    |
| Saudi Arabia                                  | 0.02   | (-0.02 | to     | 0.12  | (0.12  | to | -2.28  | (-2.38 | to     | -2.61 | (-2.72 | to | -0.15 | (-0.16 | to | -2.25 | (-2.35 | to |
|                                               | 0.06)  |        | 0.13)  |       | -2.19) |    | -2.50) |        | -0.13) |       | -2.15) |    |       |        |    |       |        |    |
| Sudan                                         | -0.18  | (-0.21 | to     | 0.10  | (0.09  | to | -1.04  | (-1.09 | to     | -1.34 | (-1.41 | to | -0.03 | (-0.05 | to | -1.15 | (-1.20 | to |
|                                               | -0.16) |        | 0.11)  |       | -0.98) |    | -1.28) |        | -0.01) |       | -1.10) |    |       |        |    |       |        |    |
| Syrian Arab Republic                          | -0.11  | (-0.14 | to     | 0.13  | (0.13  | to | -1.24  | (-1.47 | to     | -1.58 | (-1.84 | to | -0.02 | (-0.05 | to | -1.27 | (-1.48 | to |
|                                               | -0.09) |        | 0.14)  |       | -1.01) |    | -1.32) |        | 0.01)  |       | -1.05) |    |       |        |    |       |        |    |
| Tunisia                                       | 0.07   | (0.03  | to     | 0.11  | (0.10  | to | -1.05  | (-1.08 | to     | -1.34 | (-1.38 | to | -0.06 | (-0.09 | to | -1.03 | (-1.06 | to |
|                                               | 0.11)  |        | 0.11)  |       | -1.01) |    | -1.30) |        | -0.03) |       | -0.99) |    |       |        |    |       |        |    |
| Turkey                                        | 0.12   | (0.10  | to     | 0.37  | (0.33  | to | -1.21  | (-1.34 | to     | -2.19 | (-2.26 | to | 0.38  | (0.30  | to | -1.43 | (-1.49 | to |
|                                               | 0.15)  |        | 0.40)  |       | -1.09) |    | -2.12) |        | 0.46)  |       | -1.36) |    |       |        |    |       |        |    |
| United Arab Emirates                          | 0.29   | (0.26  | to     | 0.06  | (0.04  | to | -1.56  | (-1.99 | to     | -1.51 | (-1.85 | to | -0.09 | (-0.12 | to | -1.19 | (-1.45 | to |
|                                               | 0.32)  |        | 0.07)  |       | -1.12) |    | -1.17) |        | -0.06) |       | -0.94) |    |       |        |    |       |        |    |
| Yemen                                         | -0.31  | (-0.33 | to     | 0.08  | (0.08  | to | -1.37  | (-1.46 | to     | -1.51 | (-1.61 | to | -0.05 | (-0.07 | to | -1.29 | (-1.37 | to |
|                                               | -0.29) |        | 0.09)  |       | -1.27) |    | -1.42) |        | -0.02) |       | -1.21) |    |       |        |    |       |        |    |
| <b>South Asia</b>                             | 0.09   | (0.06  | to     | 0.14  | (0.11  | to | -1.94  | (-2.11 | to     | -1.92 | (-2.06 | to | -0.15 | (-0.23 | to | -1.68 | (-1.79 | to |
|                                               | 0.13)  |        | 0.17)  |       | -1.78) |    | -1.78) |        | -0.07) |       | -1.57) |    |       |        |    |       |        |    |
| Bangladesh                                    | -0.04  | (-0.09 | to     | 0.03  | (-0.05 | to | -3.61  | (-3.83 | to     | -3.86 | (-4.01 | to | -0.57 | (-0.69 | to | -3.42 | (-3.55 | to |
|                                               | 0.00)  |        | 0.11)  |       | -3.39) |    | -3.71) |        | -0.45) |       | -3.29) |    |       |        |    |       |        |    |
| Bhutan                                        | -0.11  | (-0.12 | to     | 0.17  | (0.13  | to | -1.39  | (-1.44 | to     | -1.88 | (-1.94 | to | -0.40 | (-0.44 | to | -1.70 | (-1.76 | to |
|                                               | -0.10) |        | 0.21)  |       | -1.34) |    | -1.81) |        | -0.36) |       | -1.65) |    |       |        |    |       |        |    |
| India                                         | 0.11   | (0.06  | to     | 0.18  | (0.14  | to | -1.90  | (-2.08 | to     | -1.84 | (-2.00 | to | -0.06 | (-0.16 | to | -1.60 | (-1.73 | to |
|                                               | 0.15)  |        | 0.22)  |       | -1.73) |    | -1.68) |        | 0.03)  |       | -1.46) |    |       |        |    |       |        |    |
| Nepal                                         | 0.24   | (0.20  | to     | -0.13 | (-0.16 | to | -1.44  | (-1.62 | to     | -1.94 | (-2.13 | to | -0.38 | (-0.41 | to | -1.75 | (-1.93 | to |
|                                               | 0.27)  |        | -0.10) |       | -1.26) |    | -1.74) |        | -0.35) |       | -1.57) |    |       |        |    |       |        |    |
| Pakistan                                      | 0.08   | (0.05  | to     | 0.00  | (-0.03 | to | -0.90  | (-1.01 | to     | -0.90 | (-1.02 | to | -0.50 | (-0.57 | to | -0.86 | (-0.96 | to |
|                                               | 0.12)  |        | 0.03)  |       | -0.79) |    | -0.78) |        | -0.44) |       | -0.75) |    |       |        |    |       |        |    |
| <b>Southeast Asia, East Asia, and Oceania</b> | -0.43  | (-0.54 | to     | 0.02  | (-0.04 | to | -2.52  | (-2.59 | to     | -2.83 | (-2.89 | to | -0.82 | (-0.90 | to | -2.48 | (-2.54 | to |
|                                               | -0.32) |        | 0.09)  |       | -2.44) |    | -2.76) |        | -0.74) |       | -2.43) |    |       |        |    |       |        |    |
| <b>East Asia</b>                              | -0.55  | (-0.69 | to     | -0.01 | (-0.09 | to | -3.31  | (-3.45 | to     | -3.89 | (-4.01 | to | -0.87 | (-0.96 | to | -3.19 | (-3.27 | to |
|                                               | -0.41) |        | 0.07)  |       | -3.17) |    | -3.77) |        | -0.79) |       | -3.11) |    |       |        |    |       |        |    |
| China                                         | -0.56  | (-0.70 | to     | -0.01 | (-0.08 | to | -3.38  | (-3.53 | to     | -3.99 | (-4.12 | to | -0.89 | (-0.97 | to | -3.26 | (-3.34 | to |
|                                               | -0.42) |        | 0.07)  |       | -3.24) |    | -3.87) |        | -0.80) |       | -3.17) |    |       |        |    |       |        |    |
| Democratic People's Republic of Korea         | -0.56  | (-0.62 | to     | -0.21 | (-0.24 | to | -1.01  | (-1.11 | to     | -1.21 | (-1.26 | to | -0.35 | (-0.38 | to | -1.09 | (-1.13 | to |
|                                               | -0.51) |        | -0.18) |       | -0.92) |    | -1.16) |        | -0.32) |       | -1.05) |    |       |        |    |       |        |    |
| Taiwan (Province of China)                    | -0.25  | (-0.28 | to     | -0.17 | (-0.19 | to | -2.86  | (-3.10 | to     | -2.63 | (-2.85 | to | -0.52 | (-0.55 | to | -2.37 | (-2.57 | to |
|                                               | -0.22) |        | -0.15) |       | -2.62) |    | -2.41) |        | -0.49) |       | -2.18) |    |       |        |    |       |        |    |
| <b>Oceania</b>                                | -0.30  | (-0.33 | to     | 0.03  | (0.01  | to | -0.87  | (-0.91 | to     | -0.86 | (-0.89 | to | -0.03 | (-0.06 | to | -0.76 | (-0.79 | to |
|                                               | -0.27) |        | 0.04)  |       | -0.83) |    | -0.83) |        | 0.00)  |       | -0.73) |    |       |        |    |       |        |    |
| American Samoa                                | 0.06   | (-0.03 | to     | 0.02  | (0.01  | to | -0.93  | (-1.09 | to     | -0.92 | (-1.08 | to | -0.06 | (-0.11 | to | -0.81 | (-0.96 | to |

|                                        |        |        |        |       |        |    |        |        |        |       |        |    |       |        |    |       |        |    |
|----------------------------------------|--------|--------|--------|-------|--------|----|--------|--------|--------|-------|--------|----|-------|--------|----|-------|--------|----|
|                                        | 0.15)  |        | 0.03)  |       | -0.78) |    | -0.76) |        | -0.01) |       | -0.67) |    |       |        |    |       |        |    |
| Cook Islands                           | 0.09   | (0.03  | to     | 0.09  | (0.08  | to | -1.85  | (-2.00 | to     | -1.89 | (-2.07 | to | 0.03  | (-0.01 | to | -1.60 | (-1.76 | to |
|                                        | 0.15)  |        | 0.10)  |       | -1.70) |    | -1.70) |        | 0.06)  |       | -1.43) |    |       |        |    |       |        |    |
| Micronesia<br>(Federated States<br>of) | -0.17  | (-0.23 | to     | -0.01 | (-0.03 | to | -1.77  | (-1.99 | to     | -1.84 | (-2.05 | to | -0.42 | (-0.49 | to | -1.73 | (-1.93 | to |
|                                        | -0.11) |        | 0.01)  |       | -1.55) |    | -1.63) |        | -0.36) |       | -1.54) |    |       |        |    |       |        |    |
| Fiji                                   | -0.08  | (-0.10 | to     | 0.02  | (0.00  | to | -0.79  | (-0.89 | to     | -0.88 | (-0.98 | to | 0.00  | (-0.04 | to | -0.76 | (-0.86 | to |
|                                        | -0.06) |        | 0.04)  |       | -0.69) |    | -0.78) |        | 0.05)  |       | -0.67) |    |       |        |    |       |        |    |
| Guam                                   | 0.24   | (0.22  | to     | -0.03 | (-0.05 | to | -1.68  | (-2.00 | to     | -1.10 | (-1.32 | to | -0.17 | (-0.24 | to | -0.98 | (-1.17 | to |
|                                        | 0.25)  |        | -0.01) |       | -1.36) |    | -0.88) |        | -0.10) |       | -0.78) |    |       |        |    |       |        |    |
| Kiribati                               | -0.18  | (-0.25 | to     | -0.02 | (-0.03 | to | -1.59  | (-1.68 | to     | -1.75 | (-1.83 | to | -0.25 | (-0.29 | to | -1.66 | (-1.75 | to |
|                                        | -0.10) |        | -0.01) |       | -1.51) |    | -1.66) |        | -0.21) |       | -1.58) |    |       |        |    |       |        |    |
| Marshall Islands                       | -0.10  | (-0.14 | to     | -0.03 | (-0.05 | to | -1.59  | (-1.64 | to     | -1.59 | (-1.63 | to | -0.30 | (-0.33 | to | -1.49 | (-1.53 | to |
|                                        | -0.06) |        | -0.01) |       | -1.54) |    | -1.54) |        | -0.28) |       | -1.45) |    |       |        |    |       |        |    |
| Northern Mariana<br>Islands            | 0.12   | (0.06  | to     | 0.07  | (0.05  | to | -1.62  | (-1.74 | to     | -1.75 | (-1.88 | to | -0.07 | (-0.11 | to | -1.60 | (-1.73 | to |
|                                        | 0.19)  |        | 0.09)  |       | -1.50) |    | -1.61) |        | -0.04) |       | -1.48) |    |       |        |    |       |        |    |
| Papua New<br>Guinea                    | -0.36  | (-0.39 | to     | 0.04  | (0.02  | to | -0.46  | (-0.50 | to     | -0.56 | (-0.60 | to | 0.00  | (-0.04 | to | -0.48 | (-0.52 | to |
|                                        | -0.33) |        | 0.06)  |       | -0.42) |    | -0.51) |        | 0.03)  |       | -0.45) |    |       |        |    |       |        |    |
| Nauru                                  | -0.20  | (-0.24 | to     | 0.05  | (0.02  | to | -1.11  | (-1.33 | to     | -1.19 | (-1.44 | to | -0.05 | (-0.09 | to | -1.12 | (-1.34 | to |
|                                        | -0.15) |        | 0.07)  |       | -0.88) |    | -0.95) |        | -0.02) |       | -0.89) |    |       |        |    |       |        |    |
| Niue                                   | -0.02  | (-0.06 | to     | 0.06  | (0.05  | to | -1.46  | (-1.52 | to     | -1.68 | (-1.75 | to | -0.07 | (-0.09 | to | -1.52 | (-1.59 | to |
|                                        | 0.03)  |        | 0.07)  |       | -1.40) |    | -1.60) |        | -0.04) |       | -1.45) |    |       |        |    |       |        |    |
| Palau                                  | 0.00   | (-0.06 | to     | 0.04  | (0.04  | to | -0.91  | (-0.98 | to     | -0.85 | (-0.93 | to | -0.05 | (-0.07 | to | -0.76 | (-0.83 | to |
|                                        | 0.06)  |        | 0.05)  |       | -0.84) |    | -0.78) |        | -0.03) |       | -0.69) |    |       |        |    |       |        |    |
| Samoa                                  | -0.09  | (-0.16 | to     | 0.02  | (0.01  | to | -1.19  | (-1.33 | to     | -1.23 | (-1.35 | to | -0.10 | (-0.12 | to | -1.12 | (-1.23 | to |
|                                        | -0.03) |        | 0.03)  |       | -1.05) |    | -1.11) |        | -0.07) |       | -1.01) |    |       |        |    |       |        |    |
| Solomon Islands                        | -0.42  | (-0.47 | to     | 0.01  | (-0.02 | to | -0.91  | (-0.95 | to     | -0.92 | (-0.96 | to | -0.21 | (-0.25 | to | -0.87 | (-0.91 | to |
|                                        | -0.36) |        | 0.03)  |       | -0.87) |    | -0.87) |        | -0.18) |       | -0.83) |    |       |        |    |       |        |    |
| Tokelau                                | 0.14   | (0.10  | to     | 0.04  | (0.02  | to | -1.52  | (-1.58 | to     | -1.63 | (-1.69 | to | -0.18 | (-0.22 | to | -1.48 | (-1.54 | to |
|                                        | 0.18)  |        | 0.06)  |       | -1.45) |    | -1.57) |        | -0.14) |       | -1.42) |    |       |        |    |       |        |    |
| Tonga                                  | -0.32  | (-0.41 | to     | -0.03 | (-0.05 | to | -1.19  | (-1.30 | to     | -1.18 | (-1.27 | to | -0.28 | (-0.32 | to | -1.10 | (-1.19 | to |
|                                        | -0.23) |        | -0.02) |       | -1.08) |    | -1.08) |        | -0.24) |       | -1.01) |    |       |        |    |       |        |    |
| Tuvalu                                 | -0.10  | (-0.14 | to     | 0.01  | (0.00  | to | -1.49  | (-1.62 | to     | -1.57 | (-1.71 | to | -0.30 | (-0.35 | to | -1.47 | (-1.60 | to |
|                                        | -0.05) |        | 0.02)  |       | -1.36) |    | -1.43) |        | -0.24) |       | -1.34) |    |       |        |    |       |        |    |
| Vanuatu                                | -0.21  | (-0.23 | to     | -0.05 | (-0.07 | to | -1.35  | (-1.49 | to     | -1.33 | (-1.50 | to | -0.29 | (-0.33 | to | -1.24 | (-1.40 | to |
|                                        | -0.19) |        | -0.03) |       | -1.21) |    | -1.17) |        | -0.25) |       | -1.09) |    |       |        |    |       |        |    |
| <b>Southeast Asia</b>                  | -0.14  | (-0.16 | to     | 0.12  | (0.10  | to | -1.37  | (-1.41 | to     | -1.73 | (-1.77 | to | -0.48 | (-0.53 | to | -1.62 | (-1.66 | to |
|                                        | -0.13) |        | 0.13)  |       | -1.33) |    | -1.68) |        | -0.43) |       | -1.58) |    |       |        |    |       |        |    |
| Cambodia                               | -0.42  | (-0.45 | to     | 0.06  | (0.04  | to | -1.44  | (-1.53 | to     | -1.84 | (-1.94 | to | -0.55 | (-0.60 | to | -1.78 | (-1.88 | to |
|                                        | -0.38) |        | 0.07)  |       | -1.36) |    | -1.74) |        | -0.50) |       | -1.68) |    |       |        |    |       |        |    |
| Indonesia                              | 0.03   | (0.00  | to     | 0.06  | (0.03  | to | -0.54  | (-0.61 | to     | -1.31 | (-1.38 | to | -0.86 | (-0.94 | to | -1.27 | (-1.34 | to |
|                                        | 0.05)  |        | 0.08)  |       | -0.47) |    | -1.23) |        | -0.78) |       | -1.20) |    |       |        |    |       |        |    |
| Lao Peoples's<br>Democratic            | -0.38  | (-0.42 | to     | 0.08  | (0.08  | to | -2.04  | (-2.14 | to     | -2.34 | (-2.44 | to | -0.42 | (-0.46 | to | -2.20 | (-2.30 | to |
|                                        | -0.34) |        | 0.09)  |       | -1.93) |    | -2.25) |        | -0.38) |       | -2.11) |    |       |        |    |       |        |    |



|                                   |        |        |    |       |       |    |        |        |    |        |        |    |        |        |    |        |        |    |
|-----------------------------------|--------|--------|----|-------|-------|----|--------|--------|----|--------|--------|----|--------|--------|----|--------|--------|----|
| Republic                          |        |        |    |       |       |    |        |        |    |        |        |    |        |        |    |        |        |    |
| Malaysia                          | 0.23   | (0.20  | to | 0.21  | (0.19 | to | -0.61  | (-1.07 | to | -0.81  | (-1.11 | to | -0.03  | (-0.05 | to | -0.72  | (-0.98 | to |
|                                   | 0.25)  |        |    | 0.23) |       |    | -0.16) |        |    | -0.52) |        |    | -0.01) |        |    | -0.45) |        |    |
| Maldives                          | 0.03   | (-0.02 | to | 0.31  | (0.30 | to | -3.08  | (-3.31 | to | -3.60  | (-3.91 | to | -0.08  | (-0.15 | to | -2.95  | (-3.22 | to |
|                                   | 0.08)  |        |    | 0.33) |       |    | -2.84) |        |    | -3.30) |        |    | -0.02) |        |    | -2.67) |        |    |
| Mauritius                         | 0.00   | (-0.02 | to | 0.06  | (0.05 | to | -2.88  | (-3.15 | to | -3.07  | (-3.37 | to | -0.26  | (-0.29 | to | -2.78  | (-3.04 | to |
|                                   | 0.02)  |        |    | 0.07) |       |    | -2.62) |        |    | -2.77) |        |    | -0.22) |        |    | -2.51) |        |    |
| Myanmar                           | 0.02   | (0.01  | to | 0.05  | (0.04 | to | -1.82  | (-1.91 | to | -1.96  | (-2.04 | to | -0.49  | (-0.54 | to | -1.87  | (-1.95 | to |
|                                   | 0.04)  |        |    | 0.07) |       |    | -1.73) |        |    | -1.87) |        |    | -0.43) |        |    | -1.79) |        |    |
| Philippines                       | -0.46  | (-0.49 | to | 0.12  | (0.08 | to | -2.08  | (-2.24 | to | -1.89  | (-2.04 | to | -0.12  | (-0.20 | to | -1.70  | (-1.85 | to |
|                                   | -0.44) |        |    | 0.16) |       |    | -1.91) |        |    | -1.74) |        |    | -0.03) |        |    | -1.56) |        |    |
| Sri Lanka                         | 0.03   | (0.00  | to | 0.16  | (0.13 | to | -2.53  | (-3.02 | to | -3.15  | (-3.74 | to | -0.29  | (-0.35 | to | -2.79  | (-3.30 | to |
|                                   | 0.07)  |        |    | 0.19) |       |    | -2.04) |        |    | -2.56) |        |    | -0.22) |        |    | -2.27) |        |    |
| Seychelles                        | 0.03   | (0.02  | to | 0.08  | (0.06 | to | -1.08  | (-1.29 | to | -1.37  | (-1.58 | to | -0.29  | (-0.32 | to | -1.27  | (-1.47 | to |
|                                   | 0.05)  |        |    | 0.10) |       |    | -0.87) |        |    | -1.16) |        |    | -0.26) |        |    | -1.08) |        |    |
| Viet Nam                          | -0.59  | (-0.62 | to | 0.26  | (0.25 | to | -2.32  | (-2.67 | to | -2.35  | (-2.73 | to | -0.05  | (-0.11 | to | -2.11  | (-2.45 | to |
|                                   | -0.57) |        |    | 0.27) |       |    | -1.97) |        |    | -1.97) |        |    | 0.01)  |        |    | -1.76) |        |    |
| Thailand                          | -0.08  | (-0.12 | to | 0.11  | (0.10 | to | -1.32  | (-1.42 | to | -1.47  | (-1.59 | to | -0.24  | (-0.31 | to | -1.33  | (-1.45 | to |
|                                   | -0.05) |        |    | 0.12) |       |    | -1.21) |        |    | -1.34) |        |    | -0.17) |        |    | -1.21) |        |    |
| Timor-Leste                       | -0.28  | (-0.31 | to | 0.18  | (0.16 | to | -0.92  | (-1.05 | to | -1.31  | (-1.50 | to | -0.19  | (-0.23 | to | -1.21  | (-1.39 | to |
|                                   | -0.24) |        |    | 0.19) |       |    | -0.79) |        |    | -1.12) |        |    | -0.15) |        |    | -1.04) |        |    |
| <b>Sub-Saharan Africa</b>         | -0.29  | (-0.33 | to | 0.09  | (0.08 | to | -0.86  | (-0.94 | to | -1.02  | (-1.10 | to | 0.03   | (0.01  | to | -0.94  | (-1.00 | to |
|                                   | -0.25) |        |    | 0.10) |       |    | -0.78) |        |    | -0.95) |        |    | 0.05)  |        |    | -0.87) |        |    |
| <b>Central sub-Saharan Africa</b> | -0.18  | (-0.22 | to | 0.18  | (0.17 | to | -1.04  | (-1.10 | to | -1.12  | (-1.18 | to | 0.30   | (0.28  | to | -0.99  | (-1.05 | to |
|                                   | -0.14) |        |    | 0.19) |       |    | -0.98) |        |    | -1.06) |        |    | 0.33)  |        |    | -0.94) |        |    |
| Angola                            | -0.44  | (-0.48 | to | 0.20  | (0.19 | to | -1.00  | (-1.07 | to | -1.25  | (-1.33 | to | 0.17   | (0.15  | to | -1.14  | (-1.22 | to |
|                                   | -0.40) |        |    | 0.21) |       |    | -0.93) |        |    | -1.16) |        |    | 0.19)  |        |    | -1.06) |        |    |
| Central African Republic          | -0.22  | (-0.25 | to | 0.08  | (0.07 | to | -0.54  | (-0.61 | to | -0.69  | (-0.75 | to | 0.12   | (0.11  | to | -0.63  | (-0.68 | to |
|                                   | -0.20) |        |    | 0.09) |       |    | -0.47) |        |    | -0.63) |        |    | 0.14)  |        |    | -0.57) |        |    |
| Congo                             | -0.42  | (-0.45 | to | 0.15  | (0.13 | to | -1.24  | (-1.38 | to | -1.58  | (-1.72 | to | 0.09   | (0.05  | to | -1.44  | (-1.57 | to |
|                                   | -0.40) |        |    | 0.17) |       |    | -1.10) |        |    | -1.43) |        |    | 0.13)  |        |    | -1.31) |        |    |
| Democratic Republic of the Congo  | -0.10  | (-0.15 | to | 0.19  | (0.18 | to | -1.08  | (-1.15 | to | -1.06  | (-1.14 | to | 0.39   | (0.36  | to | -0.93  | (-0.99 | to |
|                                   | -0.05) |        |    | 0.20) |       |    | -1.01) |        |    | -0.99) |        |    | 0.43)  |        |    | -0.87) |        |    |
| Equatorial Guinea                 | 0.06   | (0.03  | to | 0.18  | (0.15 | to | -2.46  | (-2.66 | to | -3.09  | (-3.34 | to | -0.17  | (-0.20 | to | -2.77  | (-3.00 | to |
|                                   | 0.10)  |        |    | 0.22) |       |    | -2.25) |        |    | -2.85) |        |    | -0.14) |        |    | -2.55) |        |    |
| Gabon                             | -0.27  | (-0.30 | to | 0.11  | (0.10 | to | -1.17  | (-1.31 | to | -1.49  | (-1.62 | to | -0.02  | (-0.06 | to | -1.36  | (-1.48 | to |
|                                   | -0.24) |        |    | 0.13) |       |    | -1.02) |        |    | -1.35) |        |    | 0.01)  |        |    | -1.23) |        |    |
| <b>Eastern sub-Saharan Africa</b> | -0.22  | (-0.25 | to | 0.10  | (0.09 | to | -0.94  | (-1.01 | to | -1.15  | (-1.21 | to | 0.06   | (0.02  | to | -1.06  | (-1.11 | to |
|                                   | -0.19) |        |    | 0.12) |       |    | -0.88) |        |    | -1.09) |        |    | 0.09)  |        |    | -1.01) |        |    |
| Burundi                           | -0.17  | (-0.20 | to | 0.18  | (0.17 | to | -1.22  | (-1.36 | to | -1.37  | (-1.50 | to | 0.42   | (0.34  | to | -1.23  | (-1.36 | to |
|                                   | -0.15) |        |    | 0.20) |       |    | -1.08) |        |    | -1.23) |        |    | 0.49)  |        |    | -1.11) |        |    |

|                                            |                 |                    |                             |                     |    |                 |                     |                 |                     |    |                 |                     |                 |                     |
|--------------------------------------------|-----------------|--------------------|-----------------------------|---------------------|----|-----------------|---------------------|-----------------|---------------------|----|-----------------|---------------------|-----------------|---------------------|
| Comoros                                    | -0.12<br>-0.09) | (-0.14 to<br>0.11) | 0.11<br>(0.10 to<br>0.11)   | (0.10 to<br>0.11)   | to | -0.81<br>-0.66) | (-0.97 to<br>-0.66) | -1.00<br>-0.77) | (-1.23 to<br>-0.77) | to | -0.01<br>0.01)  | (-0.02 to<br>0.01)  | -0.91<br>-0.70) | (-1.11 to<br>-0.70) |
| Djibouti                                   | -0.06<br>-0.04) | (-0.07 to<br>0.11) | 0.09<br>(0.07 to<br>0.11)   | (0.07 to<br>0.11)   | to | -0.73<br>-0.64) | (-0.81 to<br>-0.64) | -0.88<br>-0.76) | (-1.01 to<br>-0.76) | to | -0.08<br>-0.04) | (-0.12 to<br>-0.04) | -0.81<br>-0.70) | (-0.92 to<br>-0.70) |
| Eritrea                                    | -0.29<br>-0.27) | (-0.32 to<br>0.16) | 0.15<br>(0.14 to<br>0.16)   | (0.14 to<br>0.21)   | to | 0.04<br>0.21)   | (-0.14 to<br>0.21)  | -0.17<br>-0.01) | (-0.34 to<br>0.21)  | to | 0.18<br>0.21)   | (0.16 to<br>0.21)   | -0.15<br>0.01)  | (-0.30 to<br>0.01)  |
| Ethiopia                                   | -0.16<br>-0.13) | (-0.18 to<br>0.05) | 0.04<br>(0.03 to<br>0.05)   | (0.03 to<br>-1.46)  | to | -1.58<br>-1.46) | (-1.70 to<br>-1.46) | -2.05<br>-1.93) | (-2.18 to<br>-1.93) | to | -0.21<br>-0.19) | (-0.24 to<br>-0.19) | -1.94<br>-1.82) | (-2.05 to<br>-1.82) |
| Kenya                                      | 0.01<br>0.03)   | (0.00 to<br>0.09)  | 0.06<br>(0.04 to<br>0.09)   | (0.04 to<br>0.10)   | to | -0.04<br>0.10)  | (-0.18 to<br>0.10)  | -0.06<br>0.13)  | (-0.24 to<br>0.13)  | to | 0.06<br>0.14)   | (-0.02 to<br>0.14)  | -0.05<br>0.12)  | (-0.22 to<br>0.12)  |
| Madagascar                                 | -0.23<br>-0.21) | (-0.26 to<br>0.15) | 0.13<br>(0.12 to<br>0.15)   | (0.12 to<br>-0.51)  | to | -0.58<br>-0.51) | (-0.65 to<br>-0.51) | -0.79<br>-0.75) | (-0.82 to<br>-0.75) | to | 0.30<br>0.36)   | (0.24 to<br>0.36)   | -0.69<br>-0.66) | (-0.72 to<br>-0.66) |
| Malawi                                     | -0.23<br>-0.16) | (-0.29 to<br>0.18) | 0.17<br>(0.16 to<br>0.18)   | (0.16 to<br>-1.08)  | to | -1.27<br>-1.08) | (-1.46 to<br>-1.08) | -1.43<br>-1.22) | (-1.64 to<br>-1.22) | to | 0.27<br>0.31)   | (0.24 to<br>0.31)   | -1.31<br>-1.11) | (-1.50 to<br>-1.11) |
| Mozambique                                 | -0.55<br>-0.49) | (-0.61 to<br>0.19) | 0.17<br>(0.16 to<br>0.19)   | (0.16 to<br>0.21)   | to | 0.12<br>0.21)   | (0.04 to<br>0.21)   | 0.27<br>0.40)   | (0.13 to<br>0.40)   | to | 0.22<br>0.28)   | (0.16 to<br>0.28)   | 0.26<br>0.38)   | (0.14 to<br>0.38)   |
| Rwanda                                     | -0.34<br>-0.30) | (-0.39 to<br>0.18) | 0.16<br>(0.15 to<br>0.18)   | (0.15 to<br>-2.45)  | to | -2.78<br>-2.45) | (-3.11 to<br>-2.45) | -3.02<br>-2.69) | (-3.35 to<br>-2.69) | to | 0.04<br>0.07)   | (0.01 to<br>0.07)   | -2.80<br>-2.49) | (-3.11 to<br>-2.49) |
| Somalia                                    | -0.08<br>-0.06) | (-0.10 to<br>0.10) | 0.09<br>(0.08 to<br>0.10)   | (0.08 to<br>-0.30)  | to | -0.41<br>-0.30) | (-0.52 to<br>-0.30) | -0.47<br>-0.38) | (-0.57 to<br>-0.38) | to | 0.11<br>0.13)   | (0.09 to<br>0.13)   | -0.43<br>-0.34) | (-0.52 to<br>-0.34) |
| South Sudan                                | 0.03<br>0.05)   | (0.01 to<br>0.11)  | 0.10<br>(0.08 to<br>0.11)   | (0.08 to<br>-0.23)  | to | -0.28<br>-0.23) | (-0.34 to<br>-0.23) | -0.48<br>-0.42) | (-0.55 to<br>-0.42) | to | 0.13<br>0.15)   | (0.10 to<br>0.15)   | -0.43<br>-0.37) | (-0.49 to<br>-0.37) |
| United Republic<br>of Tanzania             | -0.20<br>-0.17) | (-0.22 to<br>0.14) | 0.12<br>(0.11 to<br>0.14)   | (0.11 to<br>-0.46)  | to | -0.72<br>-0.46) | (-0.98 to<br>-0.46) | -0.78<br>-0.52) | (-1.03 to<br>-0.52) | to | 0.16<br>0.19)   | (0.13 to<br>0.19)   | -0.69<br>-0.46) | (-0.92 to<br>-0.46) |
| Uganda                                     | -0.56<br>-0.51) | (-0.61 to<br>0.13) | 0.11<br>(0.10 to<br>0.13)   | (0.10 to<br>-0.85)  | to | -1.04<br>-0.85) | (-1.23 to<br>-0.85) | -1.11<br>-0.88) | (-1.34 to<br>-0.88) | to | 0.07<br>0.10)   | (0.05 to<br>0.10)   | -1.00<br>-0.79) | (-1.22 to<br>-0.79) |
| Zambia                                     | -0.34<br>-0.29) | (-0.39 to<br>0.12) | 0.10<br>(0.09 to<br>0.12)   | (0.09 to<br>-0.89)  | to | -1.14<br>-0.89) | (-1.38 to<br>-0.89) | -1.14<br>-0.89) | (-1.39 to<br>-0.89) | to | -0.06<br>-0.03) | (-0.09 to<br>-0.03) | -1.07<br>-0.84) | (-1.31 to<br>-0.84) |
| <b>Southern<br/>sub-Saharan<br/>Africa</b> | -0.20<br>-0.19) | (-0.21 to<br>0.08) | 0.06<br>(0.04 to<br>0.08)   | (0.04 to<br>-0.44)  | to | -0.77<br>-0.44) | (-1.11 to<br>-0.44) | -1.09<br>-0.70) | (-1.48 to<br>-0.70) | to | -0.18<br>-0.17) | (-0.19 to<br>-0.17) | -0.95<br>-0.62) | (-1.29 to<br>-0.62) |
| Botswana                                   | -0.25<br>-0.23) | (-0.27 to<br>0.04) | 0.01<br>(-0.02 to<br>0.04)  | (-0.02 to<br>-1.16) | to | -1.59<br>-1.16) | (-2.03 to<br>-1.16) | -1.67<br>-1.22) | (-2.12 to<br>-1.22) | to | -0.41<br>-0.31) | (-0.51 to<br>-0.31) | -1.54<br>-1.12) | (-1.95 to<br>-1.12) |
| Lesotho                                    | -0.29<br>-0.25) | (-0.33 to<br>0.02) | -0.01<br>(-0.04 to<br>0.02) | (-0.04 to<br>0.68)  | to | 0.46<br>0.68)   | (0.23 to<br>0.68)   | 0.51<br>0.74)   | (0.28 to<br>0.74)   | to | -0.25<br>-0.21) | (-0.28 to<br>-0.21) | 0.42<br>0.62)   | (0.22 to<br>0.62)   |
| Namibia                                    | -0.31<br>-0.27) | (-0.36 to<br>0.14) | 0.11<br>(0.09 to<br>0.14)   | (0.09 to<br>-0.75)  | to | -0.97<br>-0.75) | (-1.19 to<br>-0.75) | -1.06<br>-0.82) | (-1.29 to<br>-0.82) | to | -0.18<br>-0.15) | (-0.20 to<br>-0.15) | -0.95<br>-0.74) | (-1.16 to<br>-0.74) |
| South Africa                               | -0.12<br>-0.10) | (-0.13 to<br>0.09) | 0.07<br>(0.06 to<br>0.09)   | (0.06 to<br>-0.54)  | to | -0.96<br>-0.54) | (-1.37 to<br>-0.54) | -1.54<br>-1.03) | (-2.05 to<br>-1.03) | to | -0.22<br>-0.18) | (-0.26 to<br>-0.18) | -1.32<br>-0.89) | (-1.76 to<br>-0.89) |
| Eswatini                                   | -0.40<br>-0.32) | (-0.48 to<br>0.06) | 0.03<br>(0.00 to<br>0.06)   | (0.00 to<br>0.31)   | to | -0.13<br>0.31)  | (-0.56 to<br>0.31)  | -0.11<br>0.33)  | (-0.55 to<br>0.33)  | to | -0.15<br>-0.12) | (-0.19 to<br>-0.12) | -0.11<br>0.28)  | (-0.51 to<br>0.28)  |
| Zimbabwe                                   | -0.40<br>-0.38) | (-0.43 to<br>0.05) | -0.02<br>(-0.08 to<br>0.05) | (-0.08 to<br>0.30)  | to | 0.13<br>0.30)   | (-0.04 to<br>0.30)  | 0.30<br>0.48)   | (0.12 to<br>0.48)   | to | 0.02<br>0.15)   | (-0.10 to<br>0.15)  | 0.27<br>0.42)   | (0.12 to<br>0.42)   |
| <b>Western</b>                             | -0.43           | (-0.48 to          | 0.07                        | (0.06 to            | to | -0.82           | (-0.92 to           | -0.95           | (-1.02 to           | to | 0.01            | (-0.02 to           | -0.87           | (-0.94 to           |

|                           |        |           |       |           |        |           |        |           |        |           |        |           |
|---------------------------|--------|-----------|-------|-----------|--------|-----------|--------|-----------|--------|-----------|--------|-----------|
| <b>sub-Saharan Africa</b> | -0.37) |           | 0.08) |           | -0.73) |           | -0.87) |           | 0.04)  |           | -0.81) |           |
| Benin                     | -0.40  | (-0.46 to | 0.06  | (0.05 to  | -1.07  | (-1.18 to | -1.11  | (-1.23 to | 0.02   | (-0.02 to | -1.02  | (-1.12 to |
|                           | -0.33) |           | 0.08) |           | -0.95) |           | -0.99) |           | 0.07)  |           | -0.91) |           |
| Burkina Faso              | -0.19  | (-0.26 to | 0.12  | (0.11 to  | -1.15  | (-1.27 to | -1.00  | (-1.15 to | 0.32   | (0.28 to  | -0.88  | (-1.02 to |
|                           | -0.11) |           | 0.13) |           | -1.03) |           | -0.85) |           | 0.36)  |           | -0.75) |           |
| Cameroon                  | -0.29  | (-0.30 to | 0.07  | (0.05 to  | -1.50  | (-1.71 to | -1.42  | (-1.63 to | -0.01  | (-0.04 to | -1.30  | (-1.49 to |
|                           | -0.28) |           | 0.08) |           | -1.29) |           | -1.21) |           | 0.03)  |           | -1.10) |           |
| Chad                      | -0.17  | (-0.20 to | 0.03  | (0.02 to  | -0.27  | (-0.42 to | -0.27  | (-0.43 to | -0.03  | (-0.07 to | -0.26  | (-0.40 to |
|                           | -0.13) |           | 0.03) |           | -0.12) |           | -0.12) |           | 0.01)  |           | -0.11) |           |
| Ghana                     | -0.61  | (-0.68 to | 0.11  | (0.10 to  | -1.47  | (-1.54 to | -1.43  | (-1.49 to | 0.10   | (0.05 to  | -1.31  | (-1.37 to |
|                           | -0.54) |           | 0.13) |           | -1.41) |           | -1.36) |           | 0.14)  |           | -1.25) |           |
| Guinea                    | -0.32  | (-0.35 to | 0.05  | (0.04 to  | -0.56  | (-0.68 to | -0.59  | (-0.69 to | -0.06  | (-0.09 to | -0.55  | (-0.64 to |
|                           | -0.29) |           | 0.06) |           | -0.43) |           | -0.49) |           | -0.03) |           | -0.45) |           |
| Guinea-Bissau             | -0.40  | (-0.44 to | 0.02  | (0.01 to  | -0.62  | (-0.68 to | -0.72  | (-0.80 to | -0.21  | (-0.23 to | -0.69  | (-0.76 to |
|                           | -0.35) |           | 0.03) |           | -0.56) |           | -0.64) |           | -0.19) |           | -0.61) |           |
| Liberia                   | -0.24  | (-0.29 to | 0.11  | (0.10 to  | -1.20  | (-1.31 to | -1.38  | (-1.51 to | 0.03   | (-0.01 to | -1.28  | (-1.40 to |
|                           | -0.19) |           | 0.12) |           | -1.08) |           | -1.26) |           | 0.06)  |           | -1.17) |           |
| Mali                      | -0.06  | (-0.08 to | 0.10  | (0.09 to  | -1.39  | (-1.47 to | -1.48  | (-1.57 to | 0.27   | (0.17 to  | -1.34  | (-1.42 to |
|                           | -0.05) |           | 0.12) |           | -1.30) |           | -1.39) |           | 0.36)  |           | -1.25) |           |
| Mauritania                | -0.46  | (-0.51 to | 0.08  | (0.07 to  | -2.40  | (-2.49 to | -2.53  | (-2.61 to | -0.08  | (-0.11 to | -2.31  | (-2.38 to |
|                           | -0.41) |           | 0.09) |           | -2.31) |           | -2.44) |           | -0.04) |           | -2.23) |           |
| Niger                     | -0.34  | (-0.38 to | 0.07  | (0.04 to  | -0.76  | (-0.84 to | -0.96  | (-1.07 to | 0.00   | (-0.09 to | -0.88  | (-0.98 to |
|                           | -0.30) |           | 0.09) |           | -0.67) |           | -0.86) |           | 0.09)  |           | -0.78) |           |
| Nigeria                   | -0.52  | (-0.60 to | 0.07  | (0.06 to  | -0.48  | (-0.65 to | -0.72  | (-0.85 to | -0.08  | (-0.09 to | -0.67  | (-0.79 to |
|                           | -0.45) |           | 0.08) |           | -0.32) |           | -0.59) |           | -0.06) |           | -0.55) |           |
| Cape Verde                | -0.31  | (-0.35 to | 0.14  | (0.12 to  | -1.13  | (-1.38 to | -1.42  | (-1.59 to | 0.05   | (0.01 to  | -1.24  | (-1.38 to |
|                           | -0.28) |           | 0.16) |           | -0.89) |           | -1.26) |           | 0.09)  |           | -1.09) |           |
| Côte d'Ivoire             | -0.51  | (-0.54 to | 0.06  | (0.05 to  | -1.27  | (-1.48 to | -1.33  | (-1.54 to | 0.02   | (-0.01 to | -1.21  | (-1.40 to |
|                           | -0.48) |           | 0.08) |           | -1.06) |           | -1.11) |           | 0.06)  |           | -1.02) |           |
| The Gambia                | -0.33  | (-0.35 to | 0.00  | (-0.01 to | -1.34  | (-1.54 to | -1.45  | (-1.68 to | -0.26  | (-0.29 to | -1.34  | (-1.55 to |
|                           | -0.32) |           | 0.01) |           | -1.14) |           | -1.21) |           | -0.23) |           | -1.12) |           |
| Sao Tome and Principe     | -0.43  | (-0.47 to | 0.06  | (0.05 to  | -1.51  | (-1.84 to | -1.75  | (-2.10 to | -0.19  | (-0.21 to | -1.62  | (-1.94 to |
|                           | -0.39) |           | 0.07) |           | -1.18) |           | -1.40) |           | -0.17) |           | -1.30) |           |
| Senegal                   | -0.31  | (-0.36 to | 0.06  | (0.05 to  | -1.03  | (-1.15 to | -1.10  | (-1.26 to | -0.02  | (-0.05 to | -1.00  | (-1.14 to |
|                           | -0.26) |           | 0.07) |           | -0.91) |           | -0.94) |           | 0.01)  |           | -0.85) |           |
| Sierra Leone              | -0.54  | (-0.62 to | 0.16  | (0.14 to  | -1.15  | (-1.22 to | -1.12  | (-1.17 to | 0.54   | (0.47 to  | -0.98  | (-1.02 to |
|                           | -0.47) |           | 0.18) |           | -1.08) |           | -1.08) |           | 0.61)  |           | -0.94) |           |
| Togo                      | -0.18  | (-0.21 to | 0.11  | (0.09 to  | -0.92  | (-1.00 to | -0.95  | (-1.03 to | 0.25   | (0.19 to  | -0.85  | (-0.91 to |
|                           | -0.14) |           | 0.13) |           | -0.85) |           | -0.87) |           | 0.31)  |           | -0.78) |           |

Note: North Africa & Middle East and South Asia are both super-regions and regions. CI=confidence interval.

DALY=disability-adjusted life-year. EAPC=estimated annual percentage change. YLD=year lived with disability.

YLL=year of life lost.



|                            |                              |                              |                              |                           |                           |                           |                        |                           |                           |                           |
|----------------------------|------------------------------|------------------------------|------------------------------|---------------------------|---------------------------|---------------------------|------------------------|---------------------------|---------------------------|---------------------------|
| Andean Latin America       | 373058<br>(294137-465085)    | 140863<br>(97847-207886)     | 50543<br>(40737-62083)       | 52197<br>(38838-70120)    | 5942<br>(4666-7395)       | 43655<br>(34042-57110)    | 24903<br>(19692-31923) | 72359<br>(53952-95137)    | 10477<br>(8623-12696)     | 28269<br>(20685-36782)    |
| Australasia                | 63253<br>(58694-67742)       | 38198<br>(24715-59523)       | 22701<br>(17212-29842)       | 9583<br>(7277-12328)      | 13328<br>(10488-16560)    | 7137<br>(6313-8100)       | 1641<br>(1257-2143)    | 14204<br>(10721-16172)    | 10346<br>(8968-11527)     | 15825<br>(12605-22994)    |
| Caribbean                  | 278278<br>(219587-341080)    | 129127<br>(93267-178869)     | 33874<br>(26528-42644)       | 44267<br>(31469-60163)    | 8900<br>(6523-11709)      | 20255<br>(16880-24620)    | 19774<br>(14156-27771) | 46752<br>(34290-66086)    | 12529<br>(10427-15182)    | 25116<br>(19118-32921)    |
| Central Asia               | 1173145<br>(1054258-1309149) | 168376<br>(127011-232484)    | 56602<br>(41414-76057)       | 39478<br>(28590-53646)    | 20237<br>(16357-24806)    | 60311<br>(51432-69088)    | 9684<br>(7864-12463)   | 44880<br>(37020-54092)    | 14238<br>(12816-15824)    | 29001<br>(22672-35084)    |
| Central Europe             | 964512<br>(839764-1091671)   | 298870<br>(224717-413799)    | 168292<br>(122481-228933)    | 52616<br>(40955-67152)    | 54694<br>(42729-67570)    | 140578<br>(123451-158896) | 9252<br>(7565-12887)   | 77394<br>(64147-90277)    | 80015<br>(70998-89933)    | 49464<br>(34233-59160)    |
| Central Latin America      | 2031944<br>(1740913-2343602) | 546521<br>(381813-805680)    | 393301<br>(297340-517353)    | 185912<br>(144104-237198) | 36178<br>(30219-43014)    | 141733<br>(121886-165140) | 79612<br>(63718-97580) | 211165<br>(163583-258318) | 91301<br>(78161-104954)   | 156372<br>(112990-188854) |
| Central Sub-Saharan Africa | 843049<br>(629422-1106950)   | 261369<br>(196003-345968)    | 53722<br>(36371-71194)       | 89254<br>(62543-132401)   | 15574<br>(10733-22385)    | 35823<br>(21455-62657)    | 43183<br>(24388-69515) | 183618<br>(111141-304070) | 21400<br>(13134-33494)    | 79128<br>(38817-111913)   |
| East Asia                  | 4698614<br>(3982096-5513225) | 2433506<br>(1929172-3160818) | 1709612<br>(1186854-2408010) | 300521<br>(207472-407260) | 239963<br>(187123-299808) | 319973<br>(255865-381414) | 68712<br>(55191-84652) | 415868<br>(356362-483170) | 130067<br>(106734-149275) | 300069<br>(252684-358011) |
| Eastern Europe             | 2575335<br>(2298785-2874695) | 611398<br>(477392-812140)    | 219514<br>(165062-293549)    | 121328<br>(89360-159944)  | 77123<br>(63287-94008)    | 558129<br>(481179-640436) | 21213<br>(17341-30074) | 99240<br>(82580-120044)   | 263459<br>(236239-291640) | 113938<br>(64668-142092)  |

|                              |                     |                   |                  |                 |                 |                  |                 |                   |                 |                 |
|------------------------------|---------------------|-------------------|------------------|-----------------|-----------------|------------------|-----------------|-------------------|-----------------|-----------------|
| Eastern                      | 2608125             | 720077            | 178794           | 204924          | 52928           | 103187           | 124840          | 687833            | 54424           | 205919          |
| Sub-Saharan Africa           | (2191259-3151159)   | (556341-942914)   | (128881-269562)  | (150651-290015) | (39435-74044)   | (65328-170639)   | (74786-195219)  | (516400-885431)   | (40217-66452)   | (107462-301135) |
| High-income Asia Pacific     | 776896              | 234503            | 328527           | 83668           | 78601           | 48064            | 12236           | 147817            | 58402           | 74928           |
|                              | (717258-824271)     | (165283-346646)   | (246786-436576)  | (58698-112642)  | (55261-105049)  | (41966-56862)    | (9472-15548)    | (110992-168027)   | (50095-63696)   | (53353-88658)   |
| High-income North America    | 1955333             | 526571            | 339838           | 92204           | 245234          | 145495           | 22691           | 222558            | 211893          | 237188          |
|                              | (1892680-2014259)   | (345756-803432)   | (259903-439670)  | (74022-113485)  | (200564-294018) | (134413-161035)  | (18436-27444)   | (185287-244896)   | (196390-223239) | (199681-326057) |
| North Africa and Middle East | 2878426             | 930743            | 280263           | 111488          | 72755           | 91833            | 70903           | 256131            | 48945           | 100126          |
|                              | (2126424-356504)    | (618724-1423304)  | (214922-355906)  | (80063-150494)  | (56928-91112)   | (74033-111078)   | (51605-87877)   | (205760-327623)   | (42093-56445)   | (74657-119155)  |
| Oceania                      | 45978               | 24737             | 7220             | 4515            | 1696            | 3181             | 1674            | 7061              | 842             | 2922            |
|                              | (35985-57692)       | (19742-30771)     | (5196-10247)     | (3129-6640)     | (1107-2576)     | (2194-4459)      | (940-2395)      | (4071-11328)      | (641-1096)      | (2145-3857)     |
| South Asia                   | 12436281            | 4489057           | 849893           | 919587          | 221978          | 909994           | 703819          | 2248080           | 298900          | 147492          |
|                              | (10954317-14414136) | (3397445-6123397) | (616184-1146403) | (700868-119111) | (166881-278494) | (707700-1093716) | (557425-836936) | (1572772-2689131) | (217378-406713) | (119799-175502) |
| Southeast Asia               | 5915349             | 950173            | 459557           | 348090          | 46686           | 254592           | 102875          | 694738            | 73414           | 217369          |
|                              | (5207219-6642923)   | (751560-1238851)  | (359409-560923)  | (279868-421610) | (38847-55186)   | (204677-376979)  | (75572-121780)  | (571637-810106)   | (64359-83289)   | (182709-256581) |
| Southern Latin America       | 372368              | 117490            | 48157            | 32935           | 7740            | 40292            | 8121            | 65454             | 31543           | 33474           |
|                              | (351788-394659)     | (75982-182613)    | (40596-59304)    | (25229-42278)   | (6670-9152)     | (36540-45859)    | (6663-10668)    | (52808-73052)     | (28747-34701)   | (19151-40516)   |
| Southern Sub-Saharan Africa  | 310794              | 184063            | 40601            | 51209           | 9230            | 21221            | 14079           | 105011            | 9973            | 41094           |
|                              | (272944-353505)     | (144959-244635)   | (34324-47042)    | (37842-68707)   | (7542-10926)    | (16850-25384)    | (11730-17255)   | (87812-125276)    | (8797-11181)    | (34998-46944)   |

|                            |                              |                            |                           |                           |                           |                           |                         |                            |                           |                           |
|----------------------------|------------------------------|----------------------------|---------------------------|---------------------------|---------------------------|---------------------------|-------------------------|----------------------------|---------------------------|---------------------------|
| Tropical Latin America     | 1193340<br>(1134408-1261300) | 501792<br>(337756-759628)  | 347165<br>(271905-445754) | 159147<br>(123400-203160) | 46997<br>(40115-54972)    | 175860<br>(155755-189220) | 49542<br>(38112-58203)  | 181150<br>(151258-202384)  | 91117<br>(84334-98288)    | 134342<br>(98881-172427)  |
| Western Europe             | 1832992<br>(1752144-1930380) | 676124<br>(471853-997888)  | 577768<br>(443914-754038) | 193550<br>(148284-247107) | 310691<br>(255911-371106) | 199700<br>(183864-224327) | 28489<br>(23147-37211)  | 336898<br>(275956-381593)  | 299807<br>(271457-323892) | 266616<br>(183532-325687) |
| Western Sub-Saharan Africa | 2862345<br>(2196426-3688872) | 889269<br>(648853-1199212) | 186794<br>(122670-250866) | 257542<br>(190011-332759) | 56026<br>(35327-78051)    | 320090<br>(226679-458546) | 84249<br>(53617-120589) | 965723<br>(628048-1439964) | 59247<br>(44506-79067)    | 242752<br>(168297-346344) |

Abbreviations: GBD, Global Burden of Diseases, Injuries, and Risk Factors Study; SDI, Socio-demographic Index.

**Supplementary Table 6** Percentage contribution of risk factors to all-age disability-adjusted life-years (DALYs) of digestive diseases in 2019 for both sexes, globally and by regions

| <b>Location</b>              | <b>Smoking</b> | <b>Alcohol use</b> | <b>Drug use</b> | <b>High body-mass index</b> |
|------------------------------|----------------|--------------------|-----------------|-----------------------------|
| <b>Global</b>                | 1.68%          | 26.93%             | 7.71%           | 2.30%                       |
| Andean Latin America         | 0.50%          | 26.61%             | 2.62%           | 2.86%                       |
| Australasia                  | 1.34%          | 25.95%             | 12.85%          | 5.71%                       |
| Caribbean                    | 1.38%          | 27.53%             | 2.34%           | 2.06%                       |
| Central Asia                 | 1.38%          | 41.71%             | 11.86%          | 1.58%                       |
| Central Europe               | 2.79%          | 41.12%             | 7.91%           | 4.47%                       |
| Central Latin America        | 0.82%          | 33.22%             | 3.81%           | 4.50%                       |
| Central Sub-Saharan Africa   | 0.60%          | 22.04%             | 1.07%           | 0.62%                       |
| East Asia                    | 3.91%          | 28.87%             | 11.26%          | 3.68%                       |
| Eastern Europe               | 2.69%          | 45.75%             | 9.93%           | 2.40%                       |
| Eastern Sub-Saharan Africa   | 0.60%          | 23.74%             | 3.59%           | 0.76%                       |
| High-income Asia Pacific     | 2.28%          | 28.82%             | 6.38%           | 3.29%                       |
| High-income North America    | 1.44%          | 35.78%             | 20.32%          | 4.34%                       |
| North Africa and Middle East | 1.27%          | 7.21%              | 4.33%           | 2.77%                       |
| Oceania                      | 3.42%          | 14.13%             | 10.09%          | 1.95%                       |
| South Asia                   | 1.24%          | 21.84%             | 9.18%           | 0.89%                       |
| Southeast Asia               | 1.57%          | 27.23%             | 7.58%           | 1.32%                       |
| Southern Latin America       | 1.35%          | 38.64%             | 15.52%          | 2.64%                       |
| Southern Sub-Saharan Africa  | 1.77%          | 25.59%             | 5.61%           | 2.29%                       |
| Tropical Latin America       | 1.55%          | 28.66%             | 2.26%           | 5.58%                       |
| Western Europe               | 2.04%          | 31.38%             | 5.47%           | 5.01%                       |
| Western Sub-Saharan Africa   | 0.50%          | 23.58%             | 0.07%           | 0.57%                       |
